## 1 **A Tad-like apparatus is required for contact-dependent prey killing in predatory social** 2 **bacteria**

3  
4 Sofiene Seef<sup>1\*</sup>, Julien Herrou<sup>1\*</sup>, Paul de Boissier<sup>2</sup>, Laetitia My<sup>1</sup>, Gael Brasseur<sup>1</sup>, Donovan Robert<sup>1</sup>,  
5 Rikesh Jain<sup>1,2</sup>, Romain Mercier<sup>1</sup>, Eric Cascales<sup>3</sup>, Bianca Habermann<sup>2</sup>, Tâm Mignot<sup>1</sup>

### 6 7 8 Affiliations:

9 <sup>1</sup> Aix-Marseille Université - CNRS UMR 7283, Institut de Microbiologie de la Méditerranée and  
10 Turing Center for Living Systems.

11 <sup>2</sup> Aix-Marseille Université - CNRS UMR 7288, Institut de Biologie du Développement de  
12 Marseille and Turing Center for Living Systems.

13 <sup>3</sup> Aix-Marseille Université - CNRS UMR 7255, Institut de Microbiologie de la Méditerranée.

14 \*denotes equal contribution

15 Correspondence: [tmignot@imm.cnrs.fr](mailto:tmignot@imm.cnrs.fr)

### 16 17 **Summary:**

18 *Myxococcus xanthus*, a soil bacterium, predaes collectively using motility to invade prey  
19 colonies. Prey lysis is mostly thought to rely on secreted factors, cocktails of antibiotics and  
20 enzymes, and direct contact with *Myxococcus* cells. In this study, we show that on surfaces the  
21 coupling of A-motility and contact-dependent killing is the central predatory mechanism driving  
22 effective prey colony invasion and consumption. At the molecular level, contact-dependent killing  
23 involves a newly discovered type IV filament-like machinery (Kil) that both promotes motility  
24 arrest and prey cell plasmolysis. In this process, Kil proteins assemble at the predator-prey contact  
25 site, suggesting that they allow tight contact with prey cells for their intoxication. Kil-like systems  
26 form a new class of Tad-like machineries in predatory bacteria, suggesting a conserved function  
27 in predator-prey interactions. This study further reveals a novel cell-cell interaction function for  
28 bacterial pili-like assemblages.

### 29 30 **Introduction:**

31 Bacterial predators have evolved strategies to consume other microbes as a nutrient source.  
32 Despite the suspected importance of predation on microbial ecology<sup>1</sup>, a limited number of bacterial  
33 species are currently reported as predatory. Amongst them, obligate intracellular predators  
34 collectively known as BALOs (*eg Bdellovibrio bacteriovorus*)<sup>1</sup>, penetrate their bacterial prey cell  
35 wall and multiply in the periplasm, escaping and killing the host bacteria<sup>2</sup>. Quite differently,  
36 facultative predators (meaning that they can be cultured in absence of prey if nutrient media are  
37 provided, *ie Myxococcus*, *Lysobacter* and *Herpetosiphon*<sup>1</sup>) attack their preys extracellularly,  
38 presumably by secreting antimicrobial substances and digesting the resulting products. Among  
39 these organisms and studied here, *Myxococcus xanthus*, a delta-proteobacterium, is of particular  
40 interest because it uses large-scale collective movements to attack prey bacteria in a so-called  
41 “wolf-pack” mechanism<sup>3</sup>.

42 A tremendous body of work describes how *Myxococcus* cells move and respond to signals  
43 in pure culture<sup>4</sup>. In contrast, mechanistic studies of the predatory cycle have been limited.  
44 Currently, it is considered that coordinated group movements allow *Myxococcus* cells to invade  
45 prey colonies and consume them via the secretion of a number of diffusible factors, extracellular  
46 enzymes, antibiotics and outer membrane vesicles<sup>3,5,6</sup>. While each of these processes could

47 contribute to predation, evidence for their requirement is still missing<sup>3</sup>. In addition, *Myxococcus*  
48 cells have also been observed to induce prey cell plasmolysis upon contact<sup>7</sup>. While a number of  
49 contact-dependent mechanisms could be involved, including Type VI secretion<sup>8</sup> and Outer  
50 Membrane Exchange (OME<sup>9</sup>, see below), none have yet been implicated in predation. In this  
51 study, we analyzed the importance of motility and contact-dependent killing in the *Myxococcus*  
52 predation cycle.

53 To explore these central questions, we first developed a sufficiently resolved imaging assay  
54 where the *Myxococcus* predation cycle can be imaged stably at the single cell level over periods  
55 of time encompassing several hours with a temporal resolution of seconds. The exact methodology  
56 underlying this technique is described in a dedicated manuscript<sup>10</sup>; briefly, the system relates  
57 predatory patterns observed at the mesoscale with single cell resolution, obtained by zooming in  
58 and out on the same microscopy specimen (Figure 1). Here, we employed it to study how  
59 *Myxococcus* cells invade and grow over *Escherichia coli* prey cells during the initial invasion stage  
60 (Figure 1, Movie S1).

61  
62 ***A-motility is required for prey colony invasion.*** Although the function of motility in prey invasion  
63 is generally accepted, *Myxococcus xanthus* possesses two independent motility systems and the  
64 relative contribution of each system to the invasion process is unknown. Social (S)-motility is a  
65 form of bacterial “twitching” motility that uses so-called Type IV pili (TFP) acting at the bacterial  
66 pole<sup>11</sup>. In this process, polymerized TFPs act like “grappling hooks” that retract and pull the cell  
67 forward. S-motility promotes the coordinated movements of *Myxococcus* cells within large cell  
68 groups due to interaction with a self-secreted extracellular matrix formed of Exo-Polysaccharide  
69 (EPS)<sup>12–14</sup>. A(Adventurous)-motility promotes the movement of *Myxococcus* single cells at the  
70 colony edges. A-motility is driven by a mobile cell-envelope motor complex (named Agl-Glt) that  
71 traffics in helical trajectories along the cell axis, driving rotational propulsion of the cell when it  
72 becomes tethered to the underlying surface at so-called bacterial Focal Adhesions (bFAs)<sup>15</sup>. We  
73 tested the relative contribution of each motility system to prey invasion by comparing the relative  
74 predatory performances of WT, A<sup>+</sup>S<sup>-</sup>( $\Delta pilA^{16}$ ) and A<sup>-</sup>( $\Delta aglQ^{16}$ ) S<sup>+</sup> (Figure 1). Interestingly,  
75 although A<sup>+</sup>S<sup>-</sup> cells were defective in the late developmental steps (fruiting body formation), they  
76 were still proficient at prey invasion (Figure 1b). On the contrary, the A<sup>-</sup>S<sup>+</sup> strain was very  
77 defective at prey colony invasion (Figure 1c). Zooming at the prey colony border, it was apparent  
78 that the A<sup>-</sup>S<sup>+</sup> cells were able to expand and contact the prey colony, but they were unable to  
79 penetrate it efficiently, suggesting that Type IV pili on their own are not sufficient for invasion  
80 (Figure 1c, Movie S2). Conversely, A-motile cells were observed to penetrate the tightly-knitted  
81 *E. coli* colony with single *Myxococcus* cells moving into the prey colony, followed by larger cell  
82 groups (Figure 1a). Similar motility requirements were also observed in a predatory assay where  
83 predatory and prey cells are pre-mixed before they are spotted on an agar surface (Figure S1a).  
84 Thus, A-motility is the main driver of prey invasion on surfaces.

85  
86 ***Invading Myxococcus cells kill prey cells upon contact.*** To further determine how A-motile cells  
87 invade the prey colony, we shot single cell time-lapse movies of the invasion process. First, we  
88 localized a bFA marker, the AglZ protein<sup>17</sup> fused to Neon-Green (AglZ-NG) in *Myxococcus* cells  
89 as they penetrate the prey colony. AglZ-NG binds to the cytoplasmic face of the Agl-Glt complex  
90 and has long been used as a bFA localization marker; it generally forms fixed fluorescent clusters  
91 on the ventral side of the cell that retain fixed positions in gliding cells<sup>17</sup>. As *Myxococcus* cells  
92 invaded prey colonies, they often formed “arrow-shaped” cell groups, in which the cells within the

93 arrow assembled focal adhesions (Figure 2a, Movie S3). *E. coli* cells lysed in the vicinity of the  
94 *Myxococcus* cells, suggesting that a contact-dependent killing mechanism as reported by Zhang *et*  
95 *al.*<sup>7</sup> occurs during prey colony invasion (Figure 2a). To observe this activity directly, we set up a  
96 *Myxococcus* - *E. coli* interaction microscopy assay where predator - prey interactions can be easily  
97 studied, isolated from a larger multicellular context (see Methods). In this system, A-motile  
98 *Myxococcus* cells were observed to mark a pause and disassemble bFAs when contacting *E. coli*  
99 cells (Figure 2b, Movie S4, further quantified below); this pause was invariably followed by the  
100 rapid death of *E. coli*, as detected by the instantaneous dispersal of a cytosolic fluorescent protein  
101 (mCherry or GFP, Figure 2b-2c, observed in n=20 cells). This observation suggest that the killing  
102 occurs by plasmolysis, a process which is likely to be the same as that described by Zhang *et al.*<sup>7</sup>.  
103 To demonstrate this, we mixed *Myxococcus* cells with *E. coli* cells in which peptidoglycan (PG)  
104 had been labeled by fluorescent D-amino Acids (TADA<sup>15</sup>). TADA is covalently incorporated into  
105 the PG pentapeptide backbone and it does not diffuse laterally<sup>18</sup>. We first observed contraction of  
106 the *E. coli* cytosolic dense region at the pole by phase contrast (Figure 2d), which was followed  
107 by the appearance of a dark area in the PG TADA staining exactly at the predator-prey contact site  
108 (Figure 2d). It is unlikely that this dark area forms due to the new incorporation of unlabeled prey  
109 PG, because it was detected immediately upon prey cell death and propagated bi-directionally  
110 afterwards (Figure 2d-e). Thus, these observations suggest that, upon contact, *Myxococcus* induces  
111 degradation of the *E. coli* PG, which provokes cell lysis due to loss of turgor pressure and hyper  
112 osmotic shock<sup>7</sup>. The bi-directional propagation of PG hydrolysis (as detected by loss of TADA  
113 signal) suggests that PG hydrolysis could be driven by the activity of PG hydrolase(s)  
114 disseminating from the predator-prey contact site.

115  
116 ***A predicted Tad-pilus is required for contact-dependent killing.*** We next aimed to identify the  
117 molecular system that underlies contact-dependent killing. Although motility appears to be  
118 essential during the predation process (Figure S1a), at the microscopic level, direct transplantation  
119 of A<sup>+</sup>S<sup>-</sup> (*aglQ pilA*) in *E. coli* prey colonies still exhibit contact-dependent killing (Figure S1a-b),  
120 demonstrating that the killing activity is not carried by the motility complexes themselves.  
121 *Myxococcus xanthus* also expresses a functional Type VI secretion system (T6SS), which appears  
122 to act as a factor modulating population homeostasis and mediating Kin discrimination between  
123 *M. xanthus* strains<sup>8,19</sup>. A T6SS deletion strain ( $\Delta t6ss$ ) had no observable defect in contact-  
124 dependent killing of prey cells (Figure S1a and S1c). In addition, the *Myxococcus* T6SS assembled  
125 in a prey-independent manner as observed using a functional VipA-GFP strain that marks the T6SS  
126 contractile sheath<sup>20</sup> (Figure S1d-f), confirming that T6SS is not involved in predatory killing on  
127 surfaces.

128 To identify the genes (directly or indirectly) involved in the contact-dependent killing  
129 mechanism, we designed an assay where contact-dependent killing can be directly monitored in  
130 liquid cultures and observed via a simple colorimetric assay. In this system, the lysis of *E. coli*  
131 cells can be directly monitored when intracellular  $\beta$ -galactosidase is released in buffer containing  
132 ChloroPhenol Red- $\beta$ -D-Galactopyranoside (CPRG), which acts as a substrate for the enzyme and  
133 generates a dark red hydrolysis reaction product<sup>21</sup>. Indeed, while *Myxococcus* or *E. coli* cells  
134 incubated alone did not produce color during a 120-hour incubation, their mixing produced red  
135 color indicative of *E. coli* lysis after 24 h (Figure S2a). In this assay, a *t6ss* mutant was still able  
136 to lyse *E. coli* cells, demonstrating that it does not report on T6SS-dependent killing (Figure S2a-  
137 b). CPRG hydrolysis was not detected when *Myxococcus* and *E. coli* were separated by a semi-  
138 permeable membrane that allows diffusion of soluble molecules, showing that the assay reports

139 contact-dependent killing (Figure S2a). In this liquid assay, the *Myxococcus - E. coli* contacts are  
140 very distinct from contacts on solid surfaces and thus, the genetic requirements are likely quite  
141 distinct. Indeed, in the liquid CPRG assay, we observed that TFPs are essential for killing while  
142 the Agl/Glt system is dispensable (Figure S2b). In this condition, TFPs promote a prey-induced  
143 aggregation of cells (Figure S2c) and thus probably mediate the necessary tight contacts between  
144 *Myxococcus* and *E. coli* cells. As shown below, the killing process itself is the same in liquid as  
145 the one observed on surfaces and it is not directly mediated by the TFPs.

146  
147 Given the probable indirect effect of TFPs, we next searched additional systems involved in CPRG  
148 contact-dependent killing, using a targeted approach and testing the effect of mutations in genome  
149 annotated cell-envelope complexes, on contact-dependent killing in liquid cultures. Doing so, we  
150 identified two critical genetic regions, the MXAN\_3102-3108 and the MXAN\_4648-4661 (Figure  
151 3). Functional annotations indicate that both genetic regions carry a complementary set of genes  
152 encoding proteins that assemble a so-called **Tight adherence** (Tad) pilus. Bacterial Tad pili are  
153 members of the type IV filament superfamily (also including Type IV pili, a and b types, and Type  
154 II secretion systems) and extrude polymeric pilin filaments assembled via inner membrane  
155 associated motors through an OM secretin<sup>22</sup>. Tad pili have been generally involved in bacterial  
156 adhesion and more recently, in contact-dependent regulation of adhesion<sup>23</sup>. Within the  
157 MXAN\_3102-3108 cluster, genes with annotated functions encode a predicted pre-pilin peptidase  
158 (CpaA and renamed Kila) following the *Caulobacter crescentus* Tad pilus encoding *cpa* genes  
159 nomenclature), a secretin homolog (CpaC/KilC) and a cytoplasmic hexameric ATPase  
160 (CpaF/KilF) (Figure 3a, Figure S3a-b, Table S1). All the other genes encode proteins of unknown  
161 function, with two predicted OM lipoproteins and several proteins containing predicted ForkHead-  
162 Associated domains (FHA<sup>24</sup>, Table S1, see discussion). The second genetic region, MXAN\_4648-  
163 4661, contains up to 14 predicted open-reading frames of which the only functionally annotated  
164 genes encode homologs of the Tad IM platform proteins (CpaG/KilG and CpaH/KilH), OM  
165 protein (CpaB/KilB), major pilin (Flp/KilK) and two pseudo-pilin subunits (KilL, M) (Figure 3a,  
166 Figure S3c-d, Table S1). However, the splitting of Tad homologs in distinct genetic clusters is a  
167 unique situation<sup>22</sup> and asks whether these genes encode proteins involved in the same function.

168 Expression analysis suggests that the cluster 1 and cluster 2 genes are expressed together  
169 and induced in starvation conditions (Figure S4a). We systematically deleted all the predicted Tad  
170 components in cluster 1 and 2 alone or in combination and measured the ability of each mutant to  
171 lyse *E. coli* in the CPRG colorimetric assay (Figure 3b). All the predicted core genes, IM platform,  
172 OM secretin and associated CpaB homolog are essential for prey lysis, with the exception of the  
173 putative pre-pilin peptidase, Kila. Deletion of the genes encoding predicted pseudo-pilins KilL  
174 and M did not affect *E. coli* killing; in these conditions, pilin fibers are only partially required  
175 because deletion of KilK, the major pilin subunit, reduces the lytic activity significantly but not  
176 fully (Figure 3b). Given that the genes are organized into potential operon structures, we confirmed  
177 that the CPRG-killing phenotypes of predicted cluster 1 and cluster 2 core genes were not caused  
178 by potential polar effects (Figure S4b). In liquid, predicted core gene mutants had the same  
179 propensity as wild-type to form biofilms in presence of the prey suggesting that they act  
180 downstream in the interaction process (Figure S2c).

181 We next tested whether liquid killing and contact-dependent killing on surfaces reflected  
182 the same process. For this, we analyzed selected *kil* mutants, predicted secretin (KilC), IM platform  
183 (KilH and KilG), OM-CpaB homolog (KilB), pilin and pseudopilins (KilK, L, M) in contact-  
184 dependent killing at the single cell level. Prey recognition is first revealed by the induction of a

185 motility pause upon prey cell contact (Figure 2). This recognition was severely impaired although  
186 not fully in secretin (*kilC*), IM platform protein (*kilG*) and triple pilin ( $\Delta$ *kilKMN*) mutants (Figure  
187 3c, ~8% of the contacts led to motility pauses vs ~30% for the WT). In contrast, recognition was  
188 not impaired to significant levels in IM platform protein (*kilH*), CpaB-homolog (*kilB*) and pilin  
189 (*kilK*) mutants (Figure 3c). The potential basis of this differential impact is further analyzed in the  
190 discussion. On the contrary, prey cell plasmolysis was dramatically impacted in all predicted core  
191 components (~2% of the contacts led to prey lysis vs ~26% for the WT), the only exception being  
192 the single pilin (*kilK*) mutant in which prey cell lysis was reduced but still present (~13%, Figure  
193 3d). Deletion of all three genes encoding pilin-like proteins nevertheless affected in prey cell  
194 killing to levels observed in core component mutants. This is not observed to such extent in the  
195 CPRG assay, which could be explained by different cell-cell interaction requirements, perhaps  
196 compensation by TFPs in liquid cultures. Given the prominent role of the pilins at the single cell  
197 level, the predicted pre-pilin peptidase KilA would have been expected to be essential. However,  
198 expression of the *kilA* gene is very low under all tested conditions (Figure S4a). Prepilin peptidases  
199 are known to be promiscuous<sup>25</sup> and thus another peptidase (ie PilD, the Type IV pilus peptidase<sup>26</sup>)  
200 could also process the Kil-associated pilins. This hypothesis could however not be tested because  
201 PilD appears essential for reasons that remain to be determined<sup>26</sup>. Altogether, the data supports  
202 that the proteins from the two clusters function in starvation conditions and that they could make  
203 up a Tad-like core structure, for prey cell recognition, regulating motility in contact with prey cells,  
204 and prey killing, allowing contact-dependent plasmolysis.

205  
206 ***Kil proteins assemble at contact sites and mediate motility regulation and killing.*** We next  
207 determined if the Kil proteins indeed form a single Tad-like system in contact with prey cells. To  
208 do so, the predicted ATPase (KilF) (Figure 3a) was N-terminally fused to the Neon Green (NG)  
209 and expressed from the native chromosomal locus. The corresponding fusion appeared fully  
210 functional (Figure S4c). In absence of prey cells, NG-KilF was diffuse in the cytoplasm.  
211 Remarkably, when *Myxococcus* cells established contact with prey cells, NG-KilF rapidly formed  
212 a fluorescent-bright cluster at the prey contact site. Cluster formation was invariably followed by  
213 a motility pause and cell lysis. Observed clusters did not localize to any specific cellular site but  
214 they formed where *Myxococcus* cells touched prey cells. Cluster formation was correlated to  
215 motility arrest and their dispersal coincided with motility resumption (Figure 4a, Movie S5). To  
216 confirm that the KilF clusters reflect assembly of a full Tad-like apparatus, we next attempted to  
217 label a component of the IM platform KilG (Cluster 2), expressing a KilG-NG fusion this time  
218 ectopically from a *pilA* promoter (*PpilA*) in a *kilG* mutant background. The fusion was partially  
219 functional (Figure S4d), but nevertheless KilG-NG clusters could also be observed forming at the  
220 prey contact site immediately after lysis (Figure 4b, Movie S6). These results strongly suggest that  
221 a Tad-apparatus assembled from the products of the cluster 1 and cluster 2 genes.

222 Additional non-core proteins are also recruited at the contact sites: downstream from *kilF* and  
223 likely co-transcribed, the MXAN\_3108 gene (*kilD*, Figures 3a and S4a) encodes a predicted  
224 cytoplasmic multidomain protein also required for killing and thus functionally associated with  
225 the Kil apparatus (Figure 3b). An NG-KilD fusion was fully functional, also forming a fluorescent-  
226 bright cluster at a prey contact site, followed by motility arrest and prey cell lysis (Figure 4c and  
227 S4c, Movie S7). Given that this protein is the most downstream component of the cluster 1 region,  
228 which facilitates further genetic manipulations (see below), we next used it as a reporter for Kil  
229 system-associated functions for further characterization and in-depth quantifications. First, to  
230 confirm that prey intoxication occurs at sites where the Kil proteins are recruited, we imaged NG-

231 KilD in the presence of *E. coli* cells labeled with TADA. As expected, PG degradation was  
232 detection at the points where the clusters are formed, showing that cluster formation correlates  
233 with contact dependent killing (Figure 4d). Using cluster assembly as a proxy for activation of the  
234 Kil system, we measured that killing is observed within ~2 min after assembly, a rapid effect which  
235 suggests that Kil system assembly is tightly connected to a prey cell lytic activity (Figure S4e).

236  
237 We next used NG-KilD as a proxy to monitor the function of the Kil Tad apparatus in prey  
238 recognition and killing. For this, NG-KilD was stably expressed from the native chromosomal  
239 locus in different genetic backgrounds (Figure S4f). In WT cells, NG-KilD clusters only formed  
240 in the presence of prey cells and ~30% contacts were productive for cluster formation (Figure 4e).  
241 In *kil* mutants, NG-KilD clusters still formed upon prey cell contact with a minor reduction (up to  
242 ~2 fold in the *KilC* and *KilK*), suggesting the Tad-like apparatus is not directly responsible for  
243 initial prey cell sensing (Figure 4e, Movie S8). Nevertheless, cluster assembly was highly  
244 correlated to motility pauses (Figure 4f); which was impaired (up to 60%) in the *kil* mutants (except  
245 in the pilin, *kilK* mutant) and most strongly in the *kilC* (secretin), *kilG* (IM platform) and triple  
246 pilin (*kilKLM*) mutants (Figure 4f). Strikingly and contrarily to WT cells, cluster formation was  
247 not followed by cell lysis in all *kil* mutants, except in the major pilin *kilK* mutant (or very rarely,  
248 ~4% of the time versus more than 80% in WT, Figure 4g). Altogether, these results indicate the  
249 Tad-like Kil system is dispensable for immediate prey recognition, but functions downstream to  
250 induce a motility pause and critically, provoke prey cell lysis.

251  
252 ***The Kil apparatus is central for Myxococcus predation.*** We next tested the exact contribution of  
253 the *kil* genes to predation and prey consumption. This question is especially relevant because a  
254 number of mechanisms have been proposed to contribute to *Myxococcus* predation and all involve  
255 the extracellular secretion of toxic cargos<sup>9,11,12</sup>. In pure cultures, deletion of the *kil* genes is not  
256 linked to detectable motility and growth phenotypes, suggesting that the Tad-like Kil system  
257 mostly operates in predatory context (Figure S4g-h). Critically, core *kil* mutants were unable to  
258 predate colonies on plate, which could be fully complemented when corresponding *kil* genes were  
259 expressed ectopically (Figure 5a). When observed by time lapse, a *kil* mutant (here  $\Delta$ *kilACF*) can  
260 invade a prey colony, but no prey killing is observed, showing that the prey killing phenotype is  
261 indeed due to the loss of contact-dependent killing (Figure 5b, Movie S9). To measure the impact  
262 of this defect quantitatively, we developed a FACS-based assay that directly measures the relative  
263 proportion of *Myxococcus* cells and *E. coli* cells in the prey colony across time (Figure 5c, see  
264 methods). In this assay, we observed that WT *Myxococcus* cells completely take over the *E. coli*  
265 population after 72h (Figure 5c). In contrast, the *E. coli* population remained fully viable when in  
266 contact with the *kilACF* triple mutant, even after 72h (Figure 5c). Predatory-null phenotypes were  
267 also observed in absence of selected Tad structural components, including the secretin (*KilC*), the  
268 ATPase (*KilF*) and the IM platform protein (*KilH*) (Figure 5d). A partial defect was observed in  
269 the pilin (*KilK*) but a triple pilin deletion mutant (*kilKLM*) was however completely deficient  
270 (Figure 5d).

271 To further test whether Kil-dependent prey killing provides the necessary nutrient source,  
272 we directly imaged *Myxococcus* growth in prey colonies, tracking single cells over the course of  
273 6 hours (see methods). This analysis revealed that invading *Myxococcus* cells grow actively during  
274 prey invasion. The *Myxococcus* cell cycle could be imaged directly in single cells: cell size  
275 increased linearly up to a certain length, which was followed by a motility pause and cytokinesis  
276 (Figure 5e, Movie S10). The daughter cells immediately resumed growth at the same speed (Figure

277 5e). Cell size and cell age are therefore linearly correlated allowing estimation of a ~5.5 hours  
278 generation time from a compilation of traces (Figure 5f, n=16). When the  $\Delta kilACF$  mutant was  
279 similarly observed, cell size tended to decrease with time and cell division was not observed  
280 (Figures 5e-5f, n=20). Cell shortening could be a consequence of starvation, as observed for  
281 example in *Bacillus subtilis*<sup>27</sup> (although this remains to be documented in *Myxococcus*). Taken  
282 together, these results demonstrate the central function of the Kil Tad apparatus in prey killing and  
283 consumption.

284

285 **The Kil system promotes killing of phylogenetically diverse prey bacteria.** *Myxococcus* is a  
286 versatile predator and can attack and digest a large number of preys<sup>28,29</sup>. We therefore tested if the  
287 Kil system also mediates predation by contact-dependent killing of other bacterial species. To this  
288 aim, we tested evolutionarily-distant preys, diderm bacteria, *Caulobacter crescentus*, *Salmonella*  
289 *typhimurium* and *Pseudomonas aeruginosa*, and monoderm, *Bacillus subtilis*. In plate assays, *M.*  
290 *xanthus* was able to lyse all tested preys, except *P. aeruginosa* (Figure 6a-f). When the Kil system  
291 was deleted, the predation ability of *M. xanthus* was severely diminished in all cases (Figure 6a-  
292 f). Consistently, *Myxococcus* assembled NG-KilD clusters in contact with *Caulobacter*,  
293 *Salmonella* and *Bacillus* cells, which in all cases led to cell plasmolysis (Figure 6g-i, Movie S11-  
294 13). *Myxococcus* cells were however unable to form lethal clusters when mixed with *Pseudomonas*  
295 cells (Movie S14), suggesting that, although the Kil system has a large spectrum of target species,  
296 it is not universally effective and resistance/evasion mechanisms must exist.

297

298 **The kil genes evolved in predatory bacteria.** We next explored bacterial genomes for the presence  
299 of *kil*-like genes. Phylogenetic analysis indicates that the ATPase (KilF), IM platform proteins  
300 (KilH and KilG) and CpaB protein (KilB) share similar evolutionary trajectories, allowing the  
301 construction of a well-supported phylogenetic tree based on a supermatrix (Figure 7, see methods).  
302 This analysis reveals that Kil-like systems are indeed related to Tad systems (ie Tad systems from  
303 alpha-proteobacteria, Figure 7) but they form specific clades in deltaproteobacteria, specifically in  
304 *Myxococcales*, in *Bdellovibrionales* and in the recently discovered *Bradymonadales*. In these  
305 bacteria, predicted Kil machineries are very similar to the *Myxococcus* Kil system, suggesting a  
306 similar function (Figure 7, Table S2). Remarkably, these bacteria are all predatory; the predatory  
307 cycle of *Bradymonadales* is yet poorly described but it is thought to be quite similar to the  
308 *Myxococcus* predatory cycle, involving surface motility and extracellular prey attack<sup>1</sup>. At first  
309 glance, *Bdellovibrio* species use a distinct predatory process, penetrating the prey cell to actively  
310 replicate in their periplasmic space<sup>2</sup>. However, this cycle involves a number of processes that are  
311 similar to Myxobacteria: *Bdellovibrio* cells also attack prey cells using gliding motility<sup>30</sup> and attach  
312 to them using Type IV pili and a number of common regulatory proteins<sup>31</sup>. Prey cell penetration  
313 follows from the ability of the predatory cell to drill a hole into the prey PG at the attachment site<sup>32</sup>.  
314 While there is currently no direct evidence that the *Bdellovibrio* Kil-like system is involved in this  
315 process, multiple genetic evidence suggest that the Kil homolog are important for prey invasion  
316 and attachment<sup>33,34</sup>. It is therefore possible that acquisition of a Tad-like system in  
317 deltaproteobacteria was key to the emergence of predation, following its specialization in a  
318 possible ancestor of the *Myxococcales*, *Bdellovibrionales* and *Bradymonadales*.

319

320 **Discussion.** Prior to this work, *Myxococcus* predation was thought to be multifactorial and involve  
321 motility, secreted proteins, Outer Membrane Vesicles (OMVs) and antibiotics (ie Myxovirescin  
322 and Myxoprincomide) to kill and digest preys extracellularly<sup>3,5</sup>. While a contribution of these

323 processes is not to be ruled out, most likely for prey cell digestion rather than killing (for example  
324 by degradative enzymes<sup>3</sup>), we show here that contact-dependent killing is the major prey killing  
325 mechanism. In *Myxococcus*, contact-dependent killing can be mediated by several processes, now  
326 including T6SS, OME and Kil. We exclude a function for the T6SS, for which a function in  
327 *Myxococcus* interspecies interactions has yet to be demonstrated. Rather, it appears that together  
328 with OME, Type VI secretion controls a phenomenon called social compatibility, in which the  
329 exchange of toxins between *Myxococcus* cells prevents immune cells from mixing with non-  
330 immune cells<sup>19</sup>. We have not tested a possible function of OME in prey killing because OME  
331 allows transfer of OM protein and lipids between *Myxococcus* cells when contact is established  
332 between identical outer membrane receptors, TraA<sup>9</sup>. OME is therefore highly *Myxococcus* species  
333 and even strain-specific and mediates social compatibility when SitA lipoprotein toxins are  
334 delivered to non-immune TraA-carrying *Myxococcus* target cells<sup>35</sup>.

335 The Kil system is both required for contact-dependent killing in liquid and on surfaces.  
336 Remarkably, proteins belonging to each motility systems show distinct requirement in liquid or on  
337 solid media. In liquid, Type-IV pili mediate prey-induced biofilm formation, which likely brings  
338 *Myxococcus* in close contact with the prey cells. This intriguing process likely requires EPS (since  
339 *pilA* mutants also lack EPS<sup>36</sup>), which deserves further exploration. On surfaces, likely a more  
340 biologically relevant context, contact-dependent killing is coupled to A-motility to penetrate prey  
341 colonies and interact with individual prey cells. The prey recognition mechanism is especially  
342 intriguing because dynamic assembly of a Tad-like system at the prey contact site is a novel  
343 observation; in general, these machineries and other Type IV filamentous systems<sup>22</sup>, such as TFPs  
344 tend to assemble at fixed cellular sites, often a cell pole<sup>11,23,37</sup>. KilD clusters do not require a  
345 functional Tad-like system to form in contact with prey cells, suggesting prey contact induces Tad  
346 assembly via an upstream signaling cascade. Such sensory system could be encoded within the  
347 clusters 1 and 2, which contain a large number of conserved genes with unknown predicted  
348 functions (up to 11 proteins of unknown functions just considering cluster 1 and 2, Figure 3a,  
349 Table S1). In particular, the large number of predicted proteins with FHA<sup>24</sup> type domains (Table  
350 S1) suggests a function in a potential signaling cascade. In *Pseudomonas aeruginosa*, FHA  
351 domain-proteins act downstream from a phosphorylation cascade triggered by contact, allowing  
352 *Pseudomonas* to fire its T6SS upon contact<sup>38</sup>. This mechanism is triggered by general perturbation  
353 of the *Pseudomonas* membrane<sup>39</sup>, which could also be the case for the Kil system. Kil assembly is  
354 provoked both by monoderm and diderm bacteria, which suggests that prey-specific determinants  
355 are unlikely. Recognition is nevertheless non-universal and does not occur in contact with  
356 *Pseudomonas* or *Myxococcus* itself. Therefore, evasion mechanisms must exist, perhaps in the  
357 form of genetic determinants that shield cells from recognition.

358  
359 The Kil Tad-like system itself is required to pause A-motility and prey cell killing. Motility  
360 regulation could be indirect because differential effects are observed depending on *kil* gene  
361 deletions (Figures 3 and 4), suggesting that assembly of a functional Tad apparatus is not strictly  
362 required for regulation. In contrast, prey killing requires a functional Tad apparatus. In particular,  
363 the pilin proteins are required during prey invasion but they are dispensable (partially) in liquid  
364 cultures showing that they do not promote toxicity. In liquid, direct contacts may be enforced by  
365 TFPs in the biofilm, perhaps rendering the Tad pilins partially redundant. Tad Pilin function would  
366 however become essential to onto prey cells on surfaces where the pili are dispensable. How the  
367 pilins organize to form polymers and whether they do, remains to be determined; the lack of the  
368 major pilin (KilK) is compensated by the remaining pseudo-pilins KilL and M, which is somewhat



369 surprising given that pseudopilins are generally considered to prime assembly of major pilin  
370 polymers<sup>22</sup>. It is currently unclear if the Kil system is also a toxin-secretion device; for example,  
371 if it also functioned as a Type II secretion system. Alternatively, the Kil complex might recruit a  
372 toxin delivery system at the prey contact site. This latter hypothesis is in fact suggested by the  
373 remaining low (but still detectable) contact-dependent toxicity of *kil* mutants (Figures 3 and 4).  
374 Given that *Myxococcus* induces prey PG degradation locally, we hypothesize that a secreted cell  
375 wall hydrolase becomes active at the prey contact site. This is not unprecedented: *Bdellovibrio*  
376 cells secrete a sophisticated set of PG modifying enzymes, D,D-endopeptidases<sup>40</sup>, L,D  
377 transpeptidases<sup>32</sup> and Lysozyme-like enzymes<sup>41</sup> to penetrate prey cells, carve them into  
378 bdelloplasts and escape. In *Myxococcus*, deleting potential D,D-endopeptidases<sup>42</sup> ( $\Delta dacB$ ) did not  
379 affect predation (Figure S5) which might not be surprising given that *Myxococcus* simply lyses its  
380 preys while *Bdellovibrio* needs to penetrate them while avoiding their lysis to support its  
381 intracellular cycle. The *Myxococcus* toxin remains to be discovered, bearing in mind, that similar  
382 to synergistic toxic T6SS effectors<sup>43</sup>, several toxic effectors could be injected, perhaps explaining  
383 how *Myxococcus* is able to kill both monoderm and diderm preys.

384  
385 The Myxobacteria are potential keystone taxa in the soil microbial food web<sup>44</sup>, meaning  
386 that Kil-dependent mechanisms could have a major impact in shaping soil eco-systems. While the  
387 Kil proteins are most similar to proteins from Tad systems, there are a number of key differences  
388 that suggest profound diversification: (i), the Kil system involves a single ATPase and other Tad  
389 proteins such as assembly proteins TadG, RcpB and pilotin TadD are missing<sup>22</sup>; (ii), several Kil  
390 proteins have unique signatures, the large number of associated genes of unknown function; in  
391 particular, the over-representation of associated FHA domain proteins, including the central  
392 hexameric ATPase KilF itself fused to an N-terminal FHA domain. The KilC secretin is also  
393 uniquely short and lacks the N0 domain, canonically found in secretin proteins<sup>45</sup>, which could be  
394 linked to increased propensity for dynamic recruitment at prey contact sites. Future studies of the  
395 Kil machinery could therefore reveal how the contact-dependent properties of Tad pili were  
396 adapted to prey cell interaction and intoxication, likely a key evolutionary process in predatory  
397 bacteria.

398  
399

## 400 **Methods**

401

### 402 **Bacterial strains, growth conditions, motility plates, western blotting and genetic constructs**

403 See Tables S3-S5 for strains, plasmids, and primers. *E. coli* cells were grown under standard  
404 laboratory conditions in Luria-Bertani (LB) broth supplemented with antibiotics, if necessary. *M.*  
405 *xanthus* strains were grown at 32°C in CYE (Casitone Yeast Extract) rich media as previously  
406 described<sup>42</sup>. *S. enterica* Typhimurium, *B. subtilis* and *P. aeruginosa* were grown overnight at 37°C  
407 in LB. *C. crescentus* strain NA1000 was grown overnight at 30°C in liquid PYE (Peptone Yeast  
408 Extract). Motility plate assays were conducted as previously described on soft (0.3%) or hard  
409 (1.5%) agar CYE plates<sup>46</sup>.

410 The deletion strains and the strains expressing the different Neon Green fusions were obtained  
411 using a double-recombination strategy as previously described<sup>46 47</sup>. Briefly, the *kil* deletion alleles  
412 (carrying ~700-nucleotide long 5' and 3' flanking sequences of *M. xanthus* locus tags) were  
413 Gibson assembled into the suicide plasmid pBJ114 (*galk*, Kan<sup>R</sup>) and used for allelic exchange.

414 Plasmids were introduced in *M. xanthus* by electroporation. After selection, clones containing the  
415 deletion alleles were identified by PCR. Using the same strategy, “Neon Green fusion” alleles were  
416 introduced at *kilD* and *kilF* loci. The corresponding strains expressed, under the control of their  
417 native promoters, C-terminal Neon Green fusions of KilD and KilF.

418  
419 For complementation of  $\Delta kilC$ ,  $\Delta kilF$ ,  $\Delta kilG$  and  $\Delta kilH$  strains, we used the pSWU19 plasmid  
420 (Kan<sup>R</sup>) allowing ectopic expression of the corresponding genes from the *pilA* promoter at Mx8-att  
421 site. The same strains transformed with the empty vector were used as controls.

422 To express KilG C-terminally fused to Neon Green, a pSWU19-*PpilA-kilG-NG* was created and  
423 transformed in the  $\Delta kilG$  strain.

424

425 Western blotting was performed as previously described<sup>46</sup> using a commercial polyclonal anti  
426 Neon-Green antibody (Chromotek).

427

## 428 **Growth in liquid cultures**

429 To compare growth rates of *M. xanthus* WT and  $\Delta kilACF$  strains, overnight CYE cultures were  
430 used to inoculate 25 ml of CYE at OD<sub>600</sub>= 0.05. Cultures were then incubated at 32°C with a  
431 shaking speed of 160 rpm. To avoid measuring cell densities at night, a second set of cultures were  
432 inoculated 12 hours later at OD<sub>600</sub>= 0.05. Every 4 hours, 1 ml sample of each culture was used to  
433 measure optical densities at 600 nm with a spectrophotometer. The different measurements were  
434 then combined into a single growth curve. This experiment was performed with three independent  
435 cultures per strain.

436

## 437 **Predation assay on agar plates**

438 Prey colony invasion on CF agar plates: *M. xanthus* and the different prey cells (except *C.*  
439 *crescentus*) were respectively grown overnight in 20 ml of CYE at 32°C and in 20 ml of LB at  
440 37°C. *C. crescentus* was grown in 20 ml of PYE at 30°C. The next day, cells were pelleted and  
441 resuspended in CF medium (MOPS 10 mM pH 7.6; KH<sub>2</sub>PO<sub>4</sub> 1 mM; MgSO<sub>4</sub> 8 mM; (NH<sub>4</sub>)<sub>2</sub>SO<sub>4</sub>  
442 0.02%; Na citrate 0.2%; Bacto Casitone 0.015%) to a final OD<sub>600</sub> of 5. 10 µl of *M. xanthus* and  
443 prey cell suspensions were then spotted next to each other (leaving less than 1-mm gap between  
444 each spot) on CF 1.5% agar plates with or without 0.07% glucose (to allow minimal growth of the  
445 prey cells) and incubated at 32°C. After 48-hours incubation, pictures of the plates were taken  
446 using a Nikon Olympus SZ61 binocular loupe (10x magnification) equipped with a camera and an  
447 oblique filter. ImageJ software was used to measure the surface of the prey spot lysed by *M.*  
448 *xanthus*.

449 Spotting predator-prey mixes on CF agar plates: to force the contact between *M. xanthus* and a  
450 prey, mixes of predator/prey were made and spotted on CF agar plates. 200 µl of a prey cell  
451 suspension (in CF, OD<sub>600</sub> = 5) were mixed with 25 µl of a *M. xanthus* cell suspension (in CF,  
452 OD<sub>600</sub> = 5) and 10 µl of this mix were spotted on CF agar plates supplemented with 0.07% glucose.  
453 As described above, pictures of the plates were taken after 24-hour incubation.

454

## 455 **Microscope invasion predation assay and contact-dependent killing.**

456 Prey colony invasion on CF agar pads: prey invasion was imaged by microscopy using the Bacto-  
457 Hubble system (the specific details of the Method are described elsewhere<sup>10</sup>). Briefly, cell  
458 suspensions concentrated to  $OD_{600}=5$  were spotted at 1 mm distance onto CF 1.5% agar pads and  
459 a Gene Frame (Thermo Fisher Scientific) was used to sandwich the pad between the slide and the  
460 coverslip and limit evaporation of the sample. Slides were incubated at 32°C for 6 hours before  
461 imaging, allowing *Myxococcus* and *E. coli* to form microcolonies. Time-lapse of the predation  
462 process was taken at 40x or 100x magnification. Movies were taken at the invasion front where  
463 *Myxococcus* cells enter the *E. coli* colony. To facilitate tracking, *M. xanthus* cells were labeled  
464 with fluorescence<sup>48</sup>. Fluorescence images were acquired every 30 seconds for up to 10 hours, at  
465 room temperature.

466  
467 Spotting predator-prey mixes on CF agar pads: to image contact-dependent killing between *M.*  
468 *xanthus* and prey cells (*E. coli*, *C. crescentus*, *B. subtilis*, *S. typhimurium* and *P. aeruginosa*), cells  
469 were grown as described above, pelleted and resuspended in CF medium to a final  $OD_{600}$  of 1.  
470 Equal volumes of *M. xanthus* and prey cell suspensions were then mixed together and 1  $\mu$ l of the  
471 mix was spotted on a freshly made CF 1.5% agar pad on a microscope slide. After the spot has  
472 dried, the agar pad was covered with a glass coverslip, and incubated in the dark at room  
473 temperature for 20-30 minutes before imaging.

474 Time-lapses experiments were performed using two automated and inverted epifluorescence  
475 microscope: a TE2000- E-PFS (Nikon), with a  $\times 100/1.4$  DLL objective and an ORCA Flash 4.0LT  
476 camera (Hamamatsu) or a Ti Nikon microscope equipped with an ORCA Flash 4.0LT camera  
477 (Hamamatsu). These microscopes are equipped with the “Perfect Focus System” (PFS) that  
478 automatically maintains focus so that the point of interest within a specimen is always kept in sharp  
479 focus at all times, despite any mechanical or thermal perturbations. Images were recorded with  
480 NIS software from Nikon. All fluorescence images were acquired with appropriate filters with a  
481 minimal exposure time to minimize photo-bleaching and phototoxicity effects: 30-minute long  
482 time-lapses (one image acquired every 30 seconds) of the predation process were taken at 100x  
483 magnification. DIA images were acquired using a 5 ms light exposure and GFP fluorescent images  
484 were acquired using a 100 ms fluorescence exposure with power intensity set to 50% (excitation  
485 wavelength 470 nm) to avoid phototoxicity.

## 486 487 **Labelling *E. coli* cells with the fluorescent D-Amino Acid TADA**

488 Lyophilized TADA (MW = 381.2g/mol, laboratory stock<sup>15</sup>) was re-suspended in DMSO at 150  
489 mM and conserved at -20°C. The labeling was performed, for 2 h in the dark at room temperature,  
490 using 2  $\mu$ l of the TADA solution for 1ml of cells culture ( $OD_{600} = 2$ ). Cells were then washed four  
491 times with 1ml of CF and directly used for predation assays on agar pad.

492

## 493 **Image Analysis**

494 Image analysis was performed under FIJI<sup>49</sup> and MicrobeJ<sup>50</sup> an ImageJ plug-in for the analysis of  
495 bacterial cells.

496 Semantic segmentation of *Myxococcus* cells: was obtained using the newly developed MiSiC  
497 system, a deep learning based bacterial cell segmentation tool<sup>10</sup>. The system was used in semantic  
498 segmentation mode and annotated manually to reveal *E. coli* lysing cells.

499 Kymograph construction: Kymographs were obtained after manual measurements of fluorescence  
500 intensities along FIJI hand-drawn segments and the FIJI-Plot profile tool. The measurements were  
501 then exported into the Prism software (Graphpad, Prism 8) to construct kymographs.

502 Cell tracking: Cell tracking and associated morphometrics were obtained using MicrobeJ. Image  
503 stacks were first processed stabilized and filtered with a moderate Gaussian blur and cells were  
504 detected by thresholding and fitted with the Plug-in “medial axis” model. Trajectories were  
505 systematically verified and corrected by hand when necessary.

506 Tracking *Myxococcus* pauses in contact with a prey, NG-KilD foci formation and prey cell lysis:  
507 in 30-minute time-lapses, contacts between prey cells and *Myxococcus* cells were scored. Pauses  
508 were counted when the predatory cell stopped all movement upon contact with the prey. We also  
509 counted if these contacts lead to the formation of NG-KilD foci and to cell lysis. Thus, for a  
510 determined *E. coli* cell, we scored the number of contacts with *Myxococcus*, the number of pauses  
511 these contacts induces in *M. xanthus* motility, the number of NG-KilD foci formed upon contacts  
512 and, ultimately, the lysis of the cell. Five independent movies were analyzed for each strain and  
513 the percentage of contacts leading to a pause in motility, NG-KilD foci formation and cell lysis  
514 was calculated. We also estimated the percentage of NG-KilD clusters leading to cell lysis

515 Tracking cluster time to lysis: Time to lysis measures the elapsed time between cluster appearance  
516 to prey cell death. Data were obtained from two biological replicates.

517

## 518 **CPRG assay for contact-dependent killing in liquid.**

519 CPRG assay in 24-well plates: *M. xanthus* and *E. coli* cultures were grown overnight, pelleted and  
520 resuspended in CF at OD<sub>600</sub> ~5. 100 µl of *M. xanthus* cell suspension (WT and mutants) were  
521 mixed with 100 µl of *E. coli* cell suspension in a 24-well plate containing, in each well, 2 ml of  
522 CF medium supplemented with CPRG (Sigma Aldrich, 20 µg/ml) and IPTG (Euromedex, 50 µM)  
523 to induce *lacZ* expression. The plates were then incubated at 32°C with shaking and pictures were  
524 taken after 24 and 48 hours of incubation. To test the contact-dependance, a two-chamber assay  
525 was carried out in a Corning 24 well-plates containing a 0.4-µm pore polycarbonate membrane  
526 insert (Corning Transwell 3413). This membrane is permeable to small metabolites and proteins  
527 and impermeable to cells. *E. coli* cells were inoculated into the top chamber and *M. xanthus* cells  
528 into the bottom chamber.

529

530 CPRG assay in 96-well plates: To evaluate the predation efficiency of the different *kil* mutants,  
531 the CPRG assay was adapted as follow: wild-type *M. xanthus* and the *kil* mutant strains were grown  
532 overnight in 15 ml of CYE. *E. coli* was grown overnight in 15 ml of LB. The next morning, *M.*  
533 *xanthus* and *E. coli* cells were pelleted and resuspended in CF at OD<sub>600</sub> = 0.5 and 10, respectively.  
534 To induce expression of the β-galactosidase, IPTG (100 µM final) was added to the *E. coli* cell  
535 suspension.

536 In a 96-well plate, 100 µl of *M. xanthus* cell suspension were mixed with 100 µl of *E. coli* cell  
537 suspension. Wells containing only *M. xanthus*, *E. coli* or CF were used as controls. The lid of the

538 96-well plate was then sealed with a breathable tape (Greiner bio-one) and the plate was incubated  
539 for 24 hours at 32°C while shaking at 160 rpm. In this setup, we observed that *M. xanthus* and  
540 *E. coli* cells aggregate at the bottom of the well and therefore come in direct contact, favoring  
541 predation in liquid.

542  
543 The next day, the plate was centrifuged 10 minutes at 4800 rpm and 25 µl of the supernatant were  
544 transferred in a new 96-well plate containing 125 µl of Z-buffer (Na<sub>2</sub>HPO<sub>4</sub> 60 mM, NaH<sub>2</sub>PO<sub>4</sub> 40  
545 mM, KCl 10 mM pH7) supplemented with 20 µg/ml of CPRG. After 15-30 minutes of incubation  
546 at 37°C, the enzymatic reaction was stopped with 65 µl of Na<sub>2</sub>CO<sub>3</sub> (1 M) and the absorbance at  
547 576 nm was measured using a TECAN Spark plate reader.

548 This experiment was performed independently four times. For Miller unit calculation, after  
549 absorbance of the blank (with CF) reaction was subtracted, the absorbances measured at 576 nm  
550 were divided by the incubation time and the volume of cell lysate used for reaction. The resulting  
551 number was then multiplied by 1000.

552

### 553 **Crystal violet biofilm staining**

554 In a 96-well plate, 100 µl of *M. xanthus* cell suspension (in CF, OD<sub>600</sub> = 0.5) were mixed with 100  
555 µl of *E. coli* cell suspension (in CF, OD<sub>600</sub> = 10) and incubated for 24 hours at 32°C while shaking  
556 at 160 rpm. The next day, the supernatant was carefully removed and the wells were washed with  
557 200 µl of CF twice. Then, 100 µl of a 0.01% crystal violet solution were added to each well and  
558 incubated for 5 minutes. Wells were washed twice with 200 µl of water before imaging.

559

### 560 **Prey CFU counting after predation**

561 *E. coli*, *S. typhi*, *P. aeruginosa* and *B. subtilis* kanamycin resistant strains were grown at 37°C in  
562 liquid LB supplemented with kanamycin (50 or 10 µg/ml). *C. crescentus* kanamycin resistant  
563 strain was grown at 30°C in liquid PYE supplemented with kanamycin (25 µg/ml). Wild-type and  
564  $\Delta$ *kilACF* *M. xanthus* strains were grown at 32°C in liquid CYE. Cells were then centrifuged and  
565 pellets were resuspended in CF at an OD<sub>600</sub> of 5. 25 µl of *M. xanthus* cell suspension and 200 µl  
566 of prey cell suspension were then mixed together and 10 µl were spotted on CF agar plates  
567 supplemented with 0.07% glucose. After drying, plates were incubated at 32°C. At 0, 8, 24, and  
568 48-hour time points, spots were harvested with a loop and resuspended in 500 µl of CF. This  
569 solution was then used to make 10-fold serial dilutions in a 96-well plate containing CF. At the  
570 exception of *C. crescentus*, 5 µl of each dilution were spotted on LB agar plates supplemented  
571 with 10 µg/ml of kanamycin and incubated at 37°C for 24 hours. *C. crescentus* dilutions were  
572 spotted on PYE agar plates supplemented with 25 µg/ml of kanamycin and incubated at 30°C for  
573 24 hours. The next day, colony-forming units were counted and the number of prey cells that  
574 survived in the predator/prey spot was calculated.

575

### 576 **Fluorescence-Activated Cell Sorting (FACS) measurements of *E. coli* killing**

577 *M. xanthus* strains (wild-type and *kil* mutants) constitutively expressing GFP were grown  
578 overnight in liquid CYE without antibiotics. *E. coli* mCherry (prey) was grown overnight in liquid

579 LB supplemented with ampicillin (100 µg/ml). The next morning, optical densities of the cultures  
580 were adjusted in CF medium to OD<sub>600</sub> = 5. *M. xanthus* GFP and *E. coli* mCherry cell suspensions  
581 were then spotted onto fresh CF 1.5% agar plates as previously described<sup>46</sup>. Briefly, 10-µl drops  
582 of the prey and the predator cell suspensions were placed next to each other and let dry. Inoculated  
583 plates were then incubated at 32°C. Time 0 corresponds to the time at which the prey and the  
584 predator spots were set on the CF agar plate. At time 0, 24, 48 and 72 hours (post predation) and  
585 for each *M. xanthus* strain, two predator/prey spot couples were harvested with a loop and  
586 resuspended in 750 µl of TPM. To fix the samples, paraformaldehyde (32% in distilled water,  
587 Electron Microscopy Sciences) was then added to the samples to a final concentration of 4%. After  
588 10-min incubation at room temperature, samples were centrifuged (8 min, 7500 rpm), cell pellets  
589 were then resuspended in fresh TPM and optical densities were adjusted to OD<sub>600</sub> ~0.1.  
590 Samples were then analyzed by flow cytometry. Flow cytometry data were acquired on a Bio-Rad  
591 S3e Cell Sorter and analyzed using the ProSort software, version 1.6. For each sample, a total  
592 population of 500,000 events was used and events corresponding to the sum of *M. xanthus*-GFP  
593 and *E. coli*-mCherry. A blue laser (488 nm, 100mW) was used for detection of forward scatter  
594 (FSC) and side scatter (SSC) and for excitation of GFP. A yellow-green laser (561 nm, 100 mW)  
595 was used for excitation of mCherry. GFP and mCherry signals were collected using, respectively,  
596 the emission filters FL1 (525/30 nm) and FL3 (615/25 nm) and a compensation was applied on the  
597 mCherry signal. Samples were run using the low-pressure mode (10,000 particles/s). To calibrate  
598 the instrument and reduce background noise, suspensions of fluorescent and non-fluorescent *M.*  
599 *xanthus* and *E. coli* cells were used: a threshold was applied on the FSC signal, and voltages of the  
600 photomultipliers for FSC, SSC, FL1 and FL3 were also adjusted. The density plots obtained (small  
601 angle scattering FSC versus wide angle scattering SSC signal) were first gated on the overlapped  
602 population of *M. xanthus* and *E. coli*, filtered to remove the multiple events and finally gated for  
603 high FL1 signal (*M. xanthus*-GFP) and high FL3 signal (*E. coli*-mCherry).

604

## 605 **Bioinformatic analyses**

606 Homology search strategy: we used several search strategies to identify all potential homologous  
607 proteins of the Kil system: we first used BLAST<sup>51,52</sup> to search for reciprocal best hits (RBH)  
608 between the *M. xanthus* and the *B. bacteriovorus* and *B. Sediminis* Kil systems, as well as the *C.*  
609 *crenscentus* Tad system, identifying *bona fide* orthologs between the three species. We limited the  
610 search space to the respective proteomes of the three species. We then used HHPRED<sup>53</sup> to search  
611 for remotely conserved homologs in *B. bacteriovorus* using the proteins from the two operons  
612 identified in *M. xanthus*. Finally, we performed domain comparisons between proteins from the *B.*  
613 *bacteriovorus* and *B. sediminis* Kil operons and *C. crescentus* Tad system to identify proteins with  
614 similar domain compositions in *M. xanthus*. Identified orthologs or homologs between the three  
615 species, the employed search strategy, as well as resulting e-values are shown in Table S2.

616

617 Structure predictions: tertiary structural models of secretin and cytoplasmic ATPase were done  
618 using Phyre2<sup>54</sup> or SWISS-MODEL<sup>55</sup>, in both cases using default parameters. Quaternary models  
619 were generated using SWISS-MODEL. Structural models were displayed using Chimera<sup>56</sup> and  
620 further processed in Illustrator™.

621

622 Phylogenetic analyses: we used the four well-conserved Kil system components for phylogenetic  
623 analysis. To collect species with secretion systems similar to the Kil system, we first used  
624 MultiGeneBLAST<sup>57</sup> with default parameters. Orthologs of the four proteins from *B. bacteriovorus*,

625 *B. Sediminis* and *C. crescentus* from closely related species were added manually. We aligned each  
626 of the four proteins separately using MAFFT<sup>58</sup> and created a supermatrix from the four individual  
627 alignments. Gblocks<sup>58</sup> using relaxed parameters was used prior to tree reconstruction to remove  
628 badly aligned or extended gap regions. The resulting alignment is shown in Suppl. File 1.  
629 Alignments of individual trees were also trimmed using Gblocks. PhyML<sup>59</sup> was used for tree  
630 reconstruction, using the JTT model and 100 bootstrap iterations. Trees were displayed with  
631 Dendroscope<sup>60</sup> and further processed in Illustrator™.

632

633

### 634 **Acknowledgements**

635 We thank Lotte Sogaard-Andersen and Anke Treuner-Lange for the gift of the VipA plasmid. We  
636 thank Laurent Aussel for *E. coli* plasmids, Anne Galinier lab for the *Bacillus subtilis* strains,  
637 Emanuele Biondi lab for the *Caulobacter crescentus* strains and Sophie Bleves for the  
638 *Pseudomonas aeruginosa* strain. We thank Dorothée Murat, Romé Voulhoux, Marcelo Nöllmann,  
639 Vladimir Pelicic and Friedhelm Pfeiffer for discussions.

640 Research in TM lab was supported by a 2019 CNRS 80-Prime allowance on bacterial predation  
641 and pattern formation. SS and PDB are supported by an MENRT thesis grant from the ministry of  
642 research.

643

### 644 **Author contributions**

645 SS, JH and TM conceived the experiments and analyzed the data. SS, JH and DR performed most  
646 experiments. GB ran FACS experiments and analyzed data. PDB and BH performed bioinformatic  
647 analysis, homology searches, structure predictions and phylogenetic analysis. LM, EC, SS and TM  
648 conceived and analyzed T6SS experiments. RM provided data with the A<sup>-</sup>S<sup>-</sup> motility mutant. TM  
649 and JH wrote the paper.

650

651

## 652 References

653

654 1. Mu, D.-S. *et al.* Bradymonabacteria, a novel bacterial predator group with versatile survival  
655 strategies in saline environments. *Microbiome* **8**, 126 (2020).

656 2. Laloux, G. Shedding Light on the Cell Biology of the Predatory Bacterium *Bdellovibrio*  
657 *bacteriovorus*. *Front Microbiol* **10**, 3136 (2019).

658 3. Thiery, S. & Kaimer, C. The Predation Strategy of *Myxococcus xanthus*. *Front Microbiol*  
659 **11**, 2 (2020).

660 4. Herrou, J. & Mignot, T. Dynamic polarity control by a tunable protein oscillator in bacteria.  
661 *Curr. Opin. Cell Biol.* **62**, 54–60 (2019).

662 5. Pérez, J., Moraleda-Muñoz, A., Marcos-Torres, F. J. & Muñoz-Dorado, J. Bacterial  
663 predation: 75 years and counting! *Environ. Microbiol.* **18**, 766–779 (2016).

664 6. Xiao, Y., Wei, X., Ebright, R. & Wall, D. Antibiotic production by myxobacteria plays a  
665 role in predation. *J. Bacteriol.* **193**, 4626–4633 (2011).

666 7. Zhang, W. *et al.* Dynamics of solitary predation by *Myxococcus xanthus* on *Escherichia*  
667 *coli* observed at the single-cell level. *Appl. Environ. Microbiol.* (2019) doi:10.1128/AEM.02286-  
668 19.

669 8. Troselj, V., Treuner-Lange, A., Søgaard-Andersen, L. & Wall, D. Physiological  
670 Heterogeneity Triggers Sibling Conflict Mediated by the Type VI Secretion System in an  
671 Aggregative Multicellular Bacterium. *mBio* **9**, (2018).

672 9. Sah, G. P. & Wall, D. Kin recognition and outer membrane exchange (OME) in  
673 myxobacteria. *Curr Opin Microbiol* **56**, 81–88 (2020).

674 10. Panigrahi, S. *et al.* MiSiC, a general deep learning-based method for the high-throughput  
675 cell segmentation of complex bacterial communities. *bioRxiv* 2020.10.07.328666 (2020)  
676 doi:10.1101/2020.10.07.328666.

677 11. Mercier, R. *et al.* The polar Ras-like GTPase MglA activates type IV pilus via SgmX to  
678 enable twitching motility in *Myxococcus xanthus*. *Proc Natl Acad Sci U S A* **117**, 28366–28373  
679 (2020).

680 12. Hu, W. *et al.* Interplay between type IV pili activity and exopolysaccharides secretion  
681 controls motility patterns in single cells of *Myxococcus xanthus*. *Sci Rep* **6**, 17790 (2016).

682 13. Li, Y. *et al.* Extracellular polysaccharides mediate pilus retraction during social motility of  
683 *Myxococcus xanthus*. *Proceedings of the National Academy of Sciences of the United States of*  
684 *America* **100**, 5443–5448 (2003).

685 14. Islam, S. T. *et al.* Modulation of bacterial multicellularity via spatio-specific  
686 polysaccharide secretion. *PLoS Biol.* **18**, e3000728 (2020).

687 15. Faure, L. M. *et al.* The mechanism of force transmission at bacterial focal adhesion  
688 complexes. *Nature* **539**, 530–535 (2016).

689 16. Sun, M., Wartel, M., Cascales, E., Shaevitz, J. W. & Mignot, T. Motor-driven intracellular  
690 transport powers bacterial gliding motility. *Proc. Natl. Acad. Sci. U.S.A.* **108**, 7559–7564 (2011).

691 17. Mignot, T., Shaevitz, J. W., Hartzell, P. L. & Zusman, D. R. Evidence that focal adhesion  
692 complexes power bacterial gliding motility. *Science* **315**, 853–856 (2007).

693 18. Kuru, E. *et al.* In Situ probing of newly synthesized peptidoglycan in live bacteria with  
694 fluorescent D-amino acids. *Angew. Chem. Int. Ed. Engl.* **51**, 12519–12523 (2012).

695 19. Vassallo, C. N., Troselj, V., Weltzer, M. L. & Wall, D. Rapid diversification of wild social  
696 groups driven by toxin-immunity loci on mobile genetic elements. *ISME J* **14**, 2474–2487 (2020).



- 697 20. Brunet, Y. R., Espinosa, L., Harchouni, S., Mignot, T. & Cascales, E. Imaging type VI  
698 secretion-mediated bacterial killing. *Cell Rep* **3**, 36–41 (2013).
- 699 21. Paradis-Bleau, C., Kritikos, G., Orlova, K., Typas, A. & Bernhardt, T. G. A Genome-Wide  
700 Screen for Bacterial Envelope Biogenesis Mutants Identifies a Novel Factor Involved in Cell Wall  
701 Precursor Metabolism. *PLoS Genetics* **10**, e1004056 (2014).
- 702 22. Denise, R., Abby, S. S. & Rocha, E. P. C. Diversification of the type IV filament  
703 superfamily into machines for adhesion, protein secretion, DNA uptake, and motility. *PLoS Biol.*  
704 **17**, e3000390 (2019).
- 705 23. Ellison, C. K. *et al.* Obstruction of pilus retraction stimulates bacterial surface sensing.  
706 *Science* **358**, 535–538 (2017).
- 707 24. Almawi, A. W., Matthews, L. A. & Guarné, A. FHA domains: Phosphopeptide binding  
708 and beyond. *Prog. Biophys. Mol. Biol.* **127**, 105–110 (2017).
- 709 25. Berry, J.-L. & Pelicic, V. Exceptionally widespread nanomachines composed of type IV  
710 pilins: the prokaryotic Swiss Army knives. *FEMS Microbiol Rev* **39**, 1–21 (2015).
- 711 26. Friedrich, C., Bulyha, I. & Søgaard-Andersen, L. Outside-In Assembly Pathway of the  
712 Type IV Pilus System in *Myxococcus xanthus*. *Journal of Bacteriology* **196**, 378–390 (2014).
- 713 27. Weart, R. B. *et al.* A metabolic sensor governing cell size in bacteria. *Cell* **130**, 335–347  
714 (2007).
- 715 28. Morgan, A. D., MacLean, R. C., Hillesland, K. L. & Velicer, G. J. Comparative analysis  
716 of myxococcus predation on soil bacteria. *Appl. Environ. Microbiol.* **76**, 6920–6927 (2010).
- 717 29. Müller, S. *et al.* Identification of Functions Affecting Predator-Prey Interactions between  
718 *Myxococcus xanthus* and *Bacillus subtilis*. *J. Bacteriol.* **198**, 3335–3344 (2016).
- 719 30. Lambert, C., Fenton, A. K., Hogley, L. & Sockett, R. E. Predatory *Bdellovibrio* bacteria  
720 use gliding motility to scout for prey on surfaces. *J. Bacteriol.* **193**, 3139–3141 (2011).
- 721 31. Milner, D. S. *et al.* Ras GTPase-like protein MglA, a controller of bacterial social-motility  
722 in Myxobacteria, has evolved to control bacterial predation by *Bdellovibrio*. *PLoS Genet.* **10**,  
723 e1004253 (2014).
- 724 32. Kuru, E. *et al.* Fluorescent D-amino-acids reveal bi-cellular cell wall modifications  
725 important for *Bdellovibrio* bacteriovorus predation. *Nat Microbiol* **2**, 1648–1657 (2017).
- 726 33. Avidan, O. *et al.* Identification and Characterization of Differentially-Regulated Type IVb  
727 Pilin Genes Necessary for Predation in Obligate Bacterial Predators. *Sci Rep* **7**, 1013 (2017).
- 728 34. Duncan, M. C. *et al.* High-Throughput Analysis of Gene Function in the Bacterial Predator  
729 *Bdellovibrio bacteriovorus*. *mBio* **10**, (2019).
- 730 35. Vassallo, C. N. *et al.* Infectious polymorphic toxins delivered by outer membrane exchange  
731 discriminate kin in myxobacteria. *Elife* **6**, (2017).
- 732 36. Black, W. P., Xu, Q. & Yang, Z. Type IV pili function upstream of the Dif chemotaxis  
733 pathway in *Myxococcus xanthus* EPS regulation. *Mol. Microbiol* **61**, 447–456 (2006).
- 734 37. Koch, M. D., Fei, C., Wingreen, N. S., Shaevitz, J. W. & Gitai, Z. Competitive binding of  
735 independent extension and retraction motors explains the quantitative dynamics of type IV pili.  
736 *Proc Natl Acad Sci U S A* **118**, e2014926118 (2021).
- 737 38. Basler, M., Ho, B. T. & Mekalanos, J. J. Tit-for-tat: type VI secretion system counterattack  
738 during bacterial cell-cell interactions. *Cell* **152**, 884–894 (2013).
- 739 39. Ho, B. T., Basler, M. & Mekalanos, J. J. Type 6 secretion system-mediated immunity to  
740 type 4 secretion system-mediated gene transfer. *Science* **342**, 250–253 (2013).
- 741 40. Lerner, T. R. *et al.* Specialized peptidoglycan hydrolases sculpt the intra-bacterial niche of  
742 predatory *Bdellovibrio* and increase population fitness. *PLoS Pathog* **8**, e1002524 (2012).

- 743 41. Harding, C. J. *et al.* A lysozyme with altered substrate specificity facilitates prey cell exit  
744 by the periplasmic predator *Bdellovibrio bacteriovorus*. *Nat Commun* **11**, 4817 (2020).
- 745 42. Zhang, H. *et al.* Establishing rod shape from spherical, peptidoglycan-deficient bacterial  
746 spores. *Proc Natl Acad Sci U S A* **117**, 14444–14452 (2020).
- 747 43. LaCourse, K. D. *et al.* Conditional toxicity and synergy drive diversity among antibacterial  
748 effectors. *Nat Microbiol* **3**, 440–446 (2018).
- 749 44. Petters, S. *et al.* The soil microbial food web revisited: Predatory myxobacteria as keystone  
750 taxa? *ISME J* (2021) doi:10.1038/s41396-021-00958-2.
- 751 45. Tosi, T. *et al.* Structural similarity of secretins from type II and type III secretion systems.  
752 *Structure* **22**, 1348–1355 (2014).
- 753 46. Bustamante, V. H., Martínez-Flores, I., Vlamakis, H. C. & Zusman, D. R. Analysis of the  
754 Frz signal transduction system of *Myxococcus xanthus* shows the importance of the conserved C-  
755 terminal region of the cytoplasmic chemoreceptor FrzCD in sensing signals. *Mol. Microbiol.* **53**,  
756 1501–1513 (2004).
- 757 47. Shaner, N. C. *et al.* A bright monomeric green fluorescent protein derived from  
758 *Branchiostoma lanceolatum*. *Nat. Methods* **10**, 407–409 (2013).
- 759 48. Ducret, A., Fleuchot, B., Bergam, P. & Mignot, T. Direct live imaging of cell-cell protein  
760 transfer by transient outer membrane fusion in *Myxococcus xanthus*. *Elife* **2**, e00868 (2013).
- 761 49. Schindelin, J. *et al.* Fiji: an open-source platform for biological-image analysis. *Nat.*  
762 *Methods* **9**, 676–682 (2012).
- 763 50. Ducret, A., Quardokus, E. M. & Brun, Y. V. MicrobeJ, a tool for high throughput bacterial  
764 cell detection and quantitative analysis. *Nat Microbiol* **1**, 16077 (2016).
- 765 51. Camacho, C. *et al.* BLAST+: architecture and applications. *BMC Bioinformatics* **10**, 421  
766 (2009).
- 767 52. Altschul, S. F. *et al.* Gapped BLAST and PSI-BLAST: a new generation of protein  
768 database search programs. *Nucleic Acids Res.* **25**, 3389–3402 (1997).
- 769 53. Hildebrand, A., Remmert, M., Biegert, A. & Söding, J. Fast and accurate automatic  
770 structure prediction with HHpred. *Proteins* **77 Suppl 9**, 128–132 (2009).
- 771 54. Kelley, L. A., Mezulis, S., Yates, C. M., Wass, M. N. & Sternberg, M. J. E. The Phyre2  
772 web portal for protein modeling, prediction and analysis. *Nat Protoc* **10**, 845–858 (2015).
- 773 55. Waterhouse, A. *et al.* SWISS-MODEL: homology modelling of protein structures and  
774 complexes. *Nucleic Acids Res.* **46**, W296–W303 (2018).
- 775 56. Pettersen, E. F. *et al.* UCSF Chimera--a visualization system for exploratory research and  
776 analysis. *J Comput Chem* **25**, 1605–1612 (2004).
- 777 57. Medema, M. H., Takano, E. & Breitling, R. Detecting sequence homology at the gene  
778 cluster level with MultiGeneBlast. *Mol. Biol. Evol.* **30**, 1218–1223 (2013).
- 779 58. Katoh, K., Misawa, K., Kuma, K. & Miyata, T. MAFFT: a novel method for rapid multiple  
780 sequence alignment based on fast Fourier transform. *Nucleic Acids Res.* **30**, 3059–3066 (2002).
- 781 59. Guindon, S. *et al.* New algorithms and methods to estimate maximum-likelihood  
782 phylogenies: assessing the performance of PhyML 3.0. *Syst. Biol.* **59**, 307–321 (2010).
- 783 60. Huson, D. H. & Scornavacca, C. Dendroscope 3: an interactive tool for rooted phylogenetic  
784 trees and networks. *Syst. Biol.* **61**, 1061–1067 (2012).
- 785 61. Livingstone, P. G., Millard, A. D., Swain, M. T. & Whitworth, D. E. Transcriptional  
786 changes when *Myxococcus xanthus* preys on *Escherichia coli* suggest myxobacterial predators are  
787 constitutively toxic but regulate their feeding. *Microb Genom* **4**, (2018).
- 788

789 **Figure and Legends**

790

791

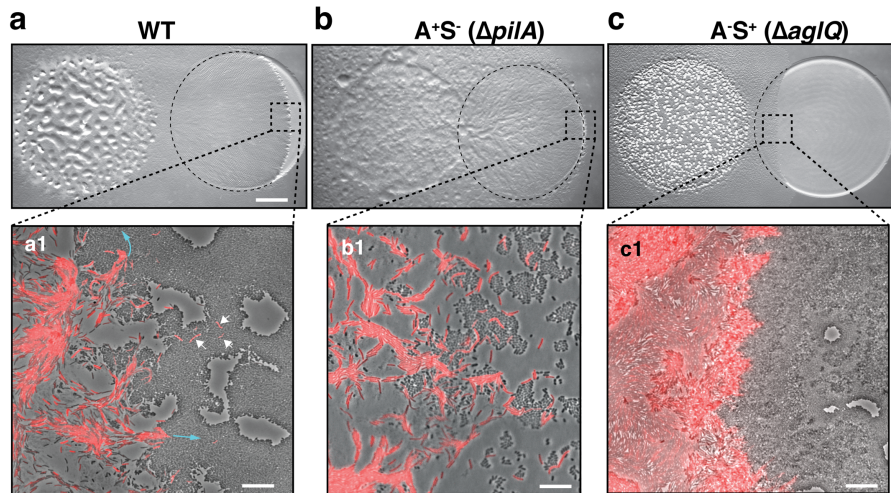

792

793

794

**Figure 1. A-motility is required for invasion of prey colonies.**

795 Colony plate assays showing invasion of an *E. coli* prey colony (dotted line) 48 hours after plating  
796 by WT (**a, Movie S1**), A<sup>+</sup>S<sup>-</sup> (**b**) and A<sup>-</sup>S<sup>+</sup> (**c, Movie S2**) strains. Scale bar = 2 mm.

797 **a1:** Zoom of the invasion front. *Myxococcus* single cells are labelled with mCherry. Blue arrows  
798 show the movement of “arrowhead” cell groups as they invade prey colonies. White arrows point  
799 to A-motile single cells that penetrated the prey colony. Scale bar = 10 μm.

800 See associated Movie S1 for the full time lapse.

801 **b1:** Zoom of the invasion front formed by A<sup>+</sup>S<sup>-</sup> cells. The A-motile *Myxococcus* cells can infiltrate  
802 the prey colony and kill prey cells. Scale bar = 10 μm.

803 **c1:** Zoom of the invasion front formed by A<sup>-</sup>S<sup>+</sup> cells. Note that the S-motile *Myxococcus* cells  
804 come in contact with the prey colony, but in absence of A-motility, the predatory cells fail to  
805 infiltrate the colony and remain stuck at the border. Scale bar = 10 μm. See associated Movie S2  
806 for the full time lapse.

807

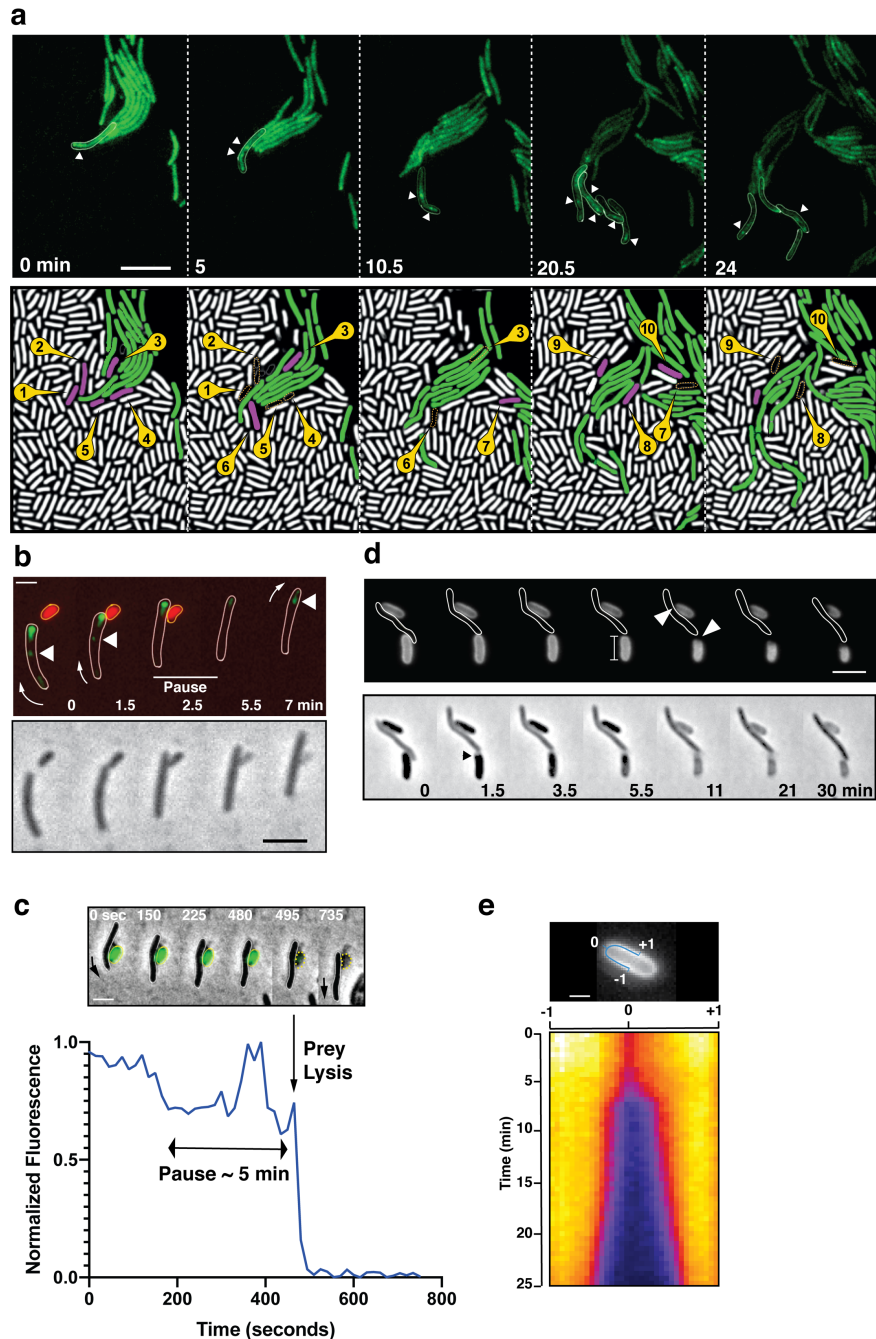

808

809

**Figure 2. A-motile cells kill prey cells by contact.**

810 **a:** Prey (*E. coli*) colony invasion by an “arrowhead formation”. Activity of the A-motility complex  
811 is followed by monitoring *Myxococcus* cells expressing the bFA-localized AglZ-YFP protein.  
812 Upper panel: Cells within the arrowhead (examples shown in white) assemble bFAs (white  
813 arrowheads). Lower panel: Semantic segmentation (see methods) of the total cell population, *E.*  
814 *coli* (white) and *Myxococcus* (green). The numbered and colored *E. coli* cells (magenta) are the  
815 ones that are observed to lyse as the *Myxococcus* cells penetrate the colony. See associated Movie  
816 S3 for the full time lapse. Scale bar = 10  $\mu$ m.

817 **b:** bFAs are disassembled when *Myxococcus* establishes lytic contacts with prey cells. Shown is  
818 an AglZ-YFP expressing *Myxococcus* cell establishing contact with an mCherry-expressing *E. coli*

819 cell (overlay and phase contrast image). Note that the *Myxococcus* cell resumes movement and  
820 thus re-initiates bFA formation immediately after *E. coli* cell lysis. See associated Movie S4 for  
821 the full time lapse. Scale bar = 2  $\mu\text{m}$ .

822 **c:** *Myxococcus* (outlined in white) provoke *E. coli* plasmolysis. Top: shown is a GFP-expressing  
823 *E. coli* cell lysing in contact with a *Myxococcus* cell. GFP fluorescence remains stable for 5 min  
824 after contact and becomes undetectable instantaneously, suggesting plasmolysis of the *E. coli* cell.  
825 Scale bar = 2  $\mu\text{m}$ . Bottom: graphic representation of fluorescence intensity loss upon prey lysis.

826 **d,e :** *Myxococcus* contact provoke local degradation of the *E. coli* peptidoglycan.

827 **d:** *E. coli* PG was labeled covalently with the fluorescent D-amino acid TADA. Two *E. coli* cells  
828 lyse upon contact. Holes in the PG-labelling are observed at the contact sites (white arrows). Note  
829 that evidence for plasmolysis and local IM membrane contraction is visible by phase contrast for  
830 the lower *E. coli* cell (dark arrow). Scale bar = 2  $\mu\text{m}$ .

831 **e:** Kymograph of TADA-labeling corresponding to the upper *E. coli* cell. At time 0 which  
832 corresponds to the detection of cell lysis, a hole is detected at the contact site and propagates bi-  
833 directionally from the initial site showing that the prey cell wall is degraded in time after cell death.  
834 Scale bar = 1  $\mu\text{m}$ .

835

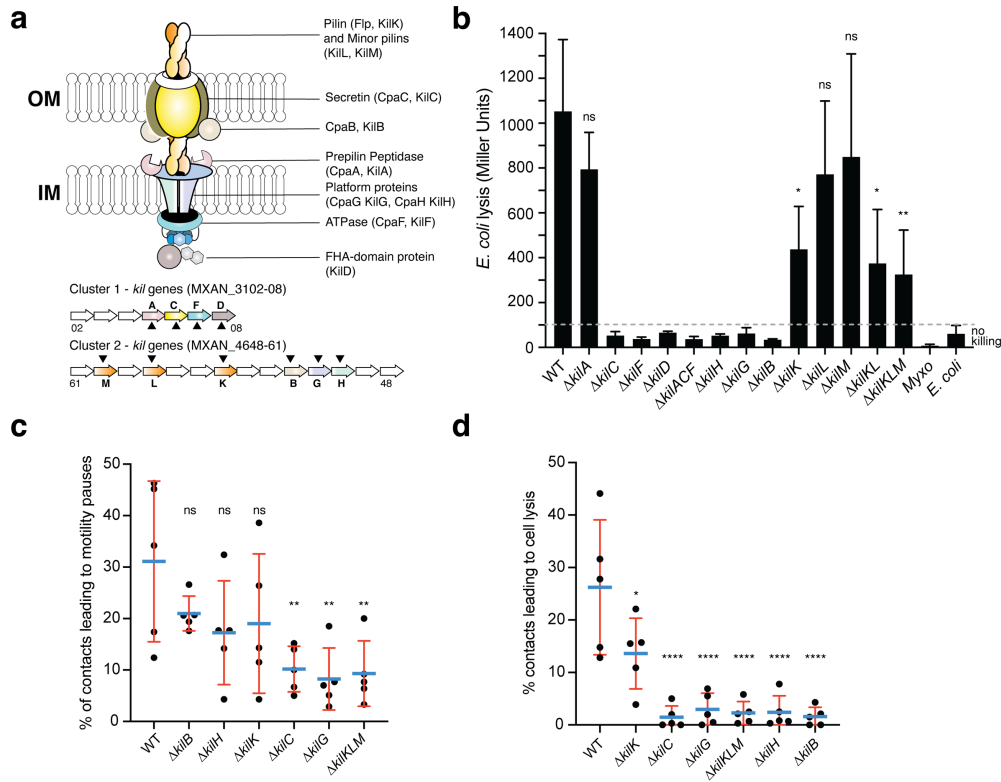

836  
837

838 **Figure 3. A Tad-like apparatus is required for prey recognition and contact-dependent**  
839 **killing.**

840 **a:** Model structure of the Kil system following bioinformatics predictions. Annotated cluster 1 and  
841 cluster 2 genes are shown together with the possible localization of their protein product. Dark  
842 triangles indicate the genes that were deleted in this study.

843 **b:** *kil* mutants are impaired in *E. coli* lysis in liquid. Kinetics CPRG-hydrolysis by  $\beta$ -Galactosidase  
844 (expressed as Miller Units) observed after co-incubation of *Myxococcus* WT and *kil* mutants and  
845 *E. coli* for 24 hours. *M. xanthus* and *E. coli* alone were used as negative controls. This experiment  
846 was performed independently four times.

847 **c:** The percentage of contacts with *E. coli* leading to a pause in motility was calculated for *M.*  
848 *xanthus* wild-type (from five independent predation movies, number of contacts observed n= 807)  
849 and *kil* mutants (number of contacts observed in  $\Delta$ *kilC*: n= 1780;  $\Delta$ *kilH*: n= 1219;  $\Delta$ *kilG*: n=1141;  
850  $\Delta$ *kilB*: n= 842;  $\Delta$ *kilK*: n=710;  $\Delta$ *kilKLM*: n= 1446)

851 **d:** The percentage of contacts with *E. coli* leading to cell lysis was also estimated.

852 In panels (b), (c) and (d), error bars represent the standard deviation of the mean. One-way  
853 ANOVA statistical analysis followed by Dunnett's posttest was performed to evaluate if the  
854 differences observed, relative to wild-type, were significant (\*:  $p \leq 0.05$ , \*\*:  $p \leq 0.01$ , \*\*\*\*:  
855  $p \leq 0.0001$ ) or not (ns:  $p > 0.05$ ).  
856

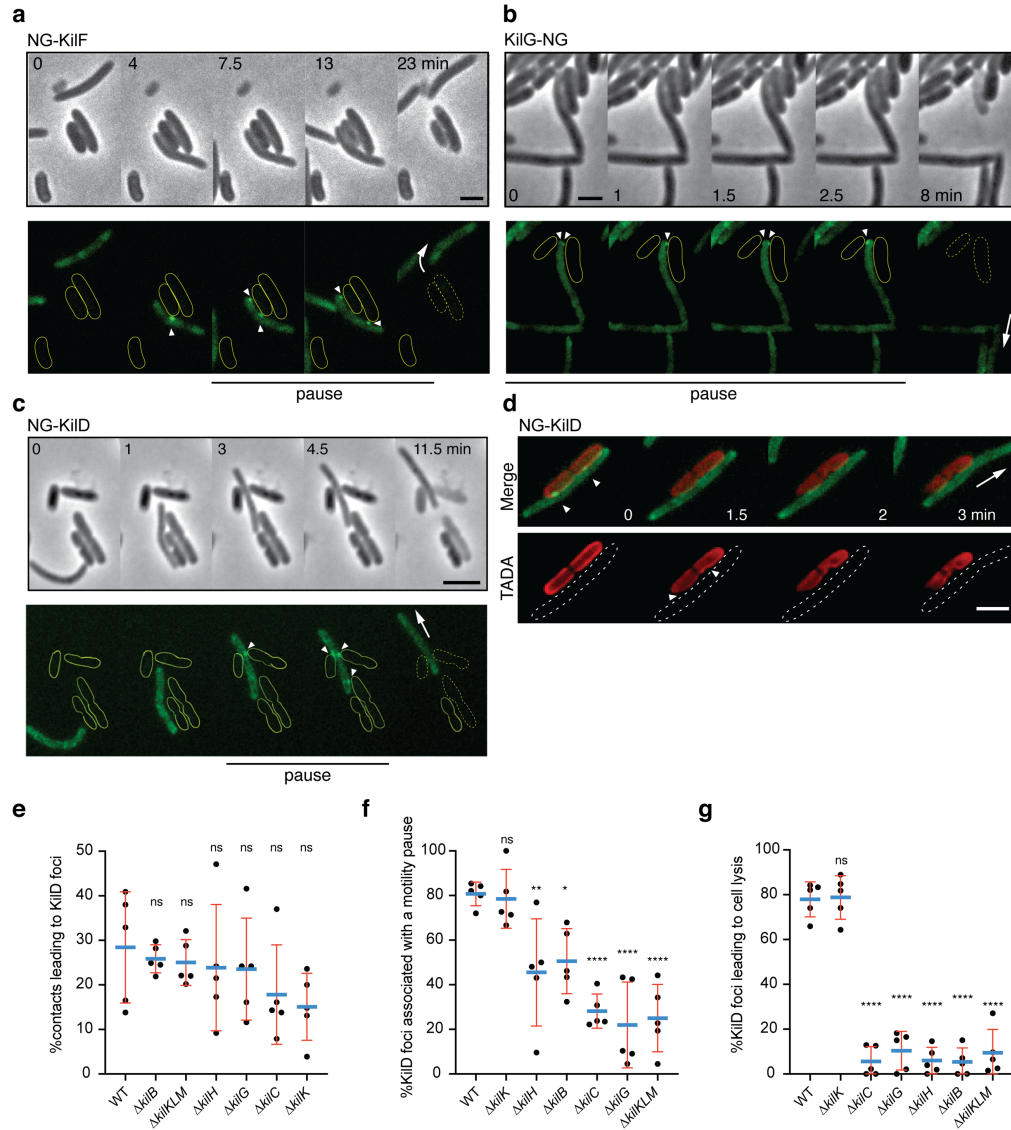

857  
858

859 **Figure 4. The Kil Tad-like system assembles upon contact and causes prey cell lysis.**

860 **a:** NG-KilF clusters form in contact with the prey and their formation precedes cell lysis. Scale  
861 bar = 2  $\mu$ m. See associated Movie S5 for the full time lapse.

862 **b:** KilG-NG forms clusters at the contact site with the prey and their formation is followed by the  
863 prey cell lysis. Scale bar = 2  $\mu$ m. See associated Movie S6 for the full time lapse.

864 **c:** NG-KilD clusters only form in contact with the prey and their formation precedes cell lysis.  
865 Scale bar = 2  $\mu$ m. See associated Movie S7 for the full time lapse.

866 **d:** PG-holes are formed at the cluster-assembly sites. Representative picture of TADA-labelled *E.*  
867 *coli* cells in the presence of NG-KilD expressing *Myxococcus xanthus* cells. PG holes and clusters  
868 are indicated with white arrows. Scale bar = 2  $\mu$ m.

869 **e:** The percentage of contacts with *E. coli* leading to KilD foci formation was calculated for *M.*  
870 *xanthus* wild-type (from five independent predation movies, number of contacts observed n= 807)  
871 and *kil* mutants (number of contacts observed in  $\Delta$ *kilC*: n= 1780;  $\Delta$ *kilH*: n= 1219;  $\Delta$ *kilG*: n=1141;  
872  $\Delta$ *kilB*: n= 842;  $\Delta$ *kilK*: n=710;  $\Delta$ *kilKLM*: n= 1446).

873 **f:** The percentage of KilD foci associated with a motility pause was also estimated for *M. xanthus*  
874 WT (from five independent predation movies, number of NG-KilD foci observed n= 198) and *kil*  
875 mutants (number of NG-KilD foci observed in  $\Delta kilC$ : n= 320;  $\Delta kilH$ : n= 270;  $\Delta kilG$ : n= 251;  $\Delta kilB$ :  
876 n= 215;  $\Delta kilK$ : n= 94;  $\Delta kilKLM$ : n= 355).

877 **g:** The percentage of KilD foci leading to *E. coli* lysis was estimated as well.

878 In panels (d), (e) and (f), error bars represent the standard deviation to the mean. One-way ANOVA  
879 statistical analysis followed by Dunnett's posttest was performed to evaluate if the differences  
880 observed, relative to wild-type, were significant (\*:  $p \leq 0.05$ , \*\*:  $p \leq 0.01$ , \*\*\*\*:  $p \leq 0.0001$ ) or not  
881 (ns:  $p > 0.05$ ).

882



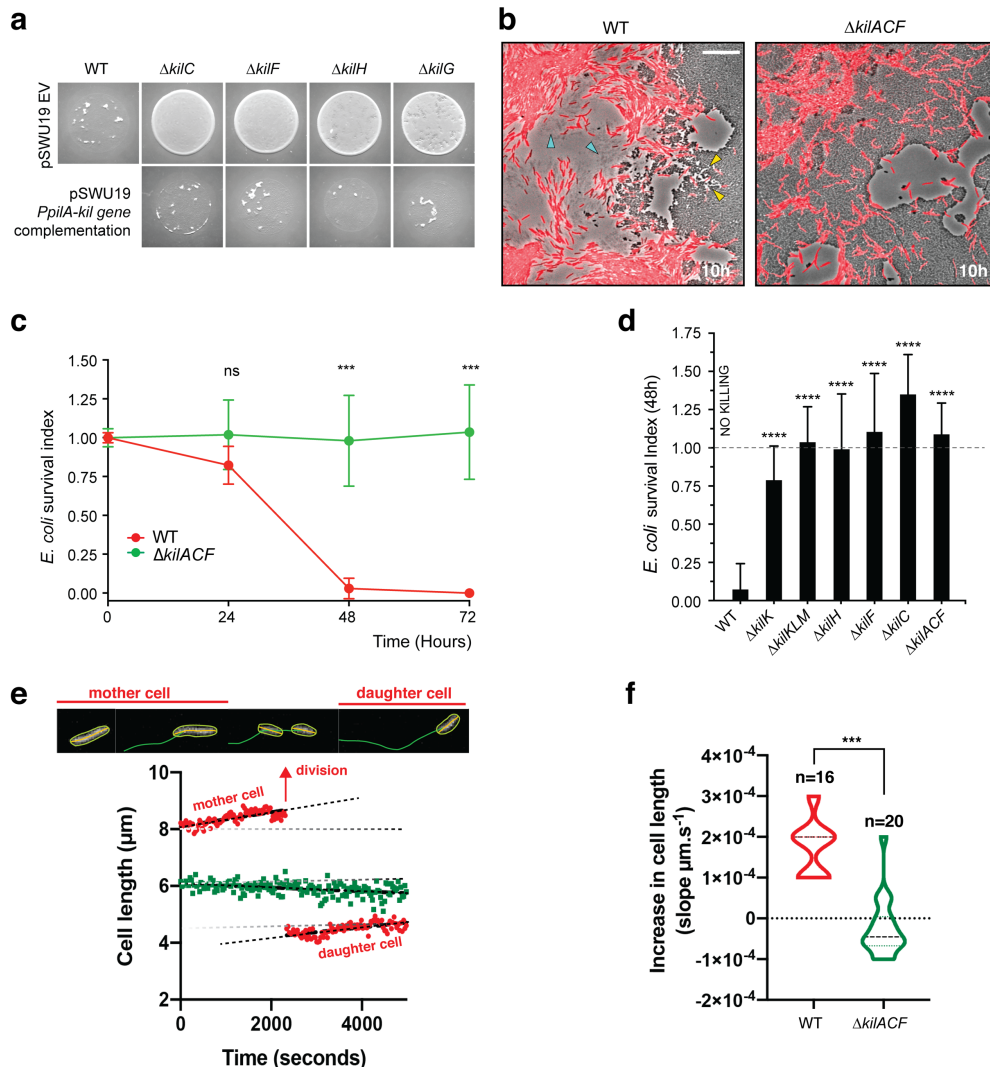

883  
884

**Figure 5. The *kil* genes are required for *M. xanthus* nutrition over prey cells.**

886 **a:** The Kil system is essential for predation. Core deletion mutants in Tad-like genes, *kilC*  
887 (Secretin), *kilF* (ATPase), *kilH* (IM platform) and *kilG* (IM platform) were mixed with *E. coli* and  
888 spotted on CF agar plates (+ 0.07% glucose). After 24 hours of incubation, the mutants carrying  
889 the empty vector (EV) pSWU19 were strongly deficient in predation. The same *kil* mutants  
890 ectopically expressing the different *kil* genes under the control of the *pilA* promoter presented a  
891 restored predation phenotype similar to the WT-EV control.

892 **b:** A *kil* mutant can invade but cannot lyse *E. coli* prey colonies. mCherry-labeled WT and triple  
893 *kilACF* mutant are shown for comparison. Note that invading WT cells form corridors (yellow  
894 arrowheads) in the prey colony and ghost *E. coli* cells as well as cell debris (blue arrowheads) are  
895 left behind the infiltrating *Myxococcus* cells. In contrast, while the  $\Delta kilACF$  penetrates the prey  
896 colony, corridors and prey ghost cells are not observed. Scale bar = 10  $\mu m$ . See corresponding  
897 Movie S9 for the full time lapse.

898 **c:** The *kil* genes are essential for prey killing. *E. coli* mCherry cells were measured by FACS at  
899 time 0, 24, 48 and 72 hours after the onset of predation. The *E. coli* survival index was calculated  
900 by dividing the percentage of “*E. coli* events” at t= 24, 48 or 72 hours by the percentage of “*E. coli*

901 events” at the beginning of the experiment (t=0). This experiment was performed over two  
902 biological replicates, in total 6 samples per time point were collected. For each sample, 500,000  
903 events were analyzed. Each data point indicates the mean  $\pm$  the standard deviation. For each time  
904 point, unpaired t-test (with Welch’s correction) statistical analysis was performed to evaluate if  
905 the differences observed, relative to wild-type, were significant (\*\*\*:  $p \leq 0.001$ ) or not (ns:  $p > 0.05$ ).  
906 **d:** *E. coli* survival in the various *kil* mutant strains at 48 h. *E. coli* mCherry cells were measured  
907 (counted) by FACS at time 0 and 48 h after predation. This experiment was performed over three  
908 biological replicates, n= 9 per strain and time point. Events were counted as a) and each data point  
909 indicates the mean  $\pm$  the standard deviation. One-way ANOVA statistical analysis followed by  
910 Dunnett’s posttest was performed to evaluate if the differences observed, relative to wild-type,  
911 were significant (\*\*\*\*:  $p \leq 0.0001$ ).  
912 **e, f:** The *kil* genes are essential for *Myxococcus* growth on prey.  
913 **e:** cell growth during invasion. Cell length is a function of cell age during invasion and can be  
914 monitored over time in WT cells (in red). In contrast, cell length tends to decrease in a  $\Delta$ *kilACF*  
915 mutant (in green) showing that they are not growing in presence of prey. See associated Movie  
916 S10 for the full time lapse.  
917 **f:** Quantification of cell growth in WT and  $\Delta$ *kilACF* mutant backgrounds. Each individual cell was  
918 tracked for 5 hours in two biological replicates for each strain. Violin plot of the growth  
919 distributions (shown as the cell size increase slopes) are shown. Statistics: Student t-test, \*\*\*:  
920  $p < 0.001$ .  
921

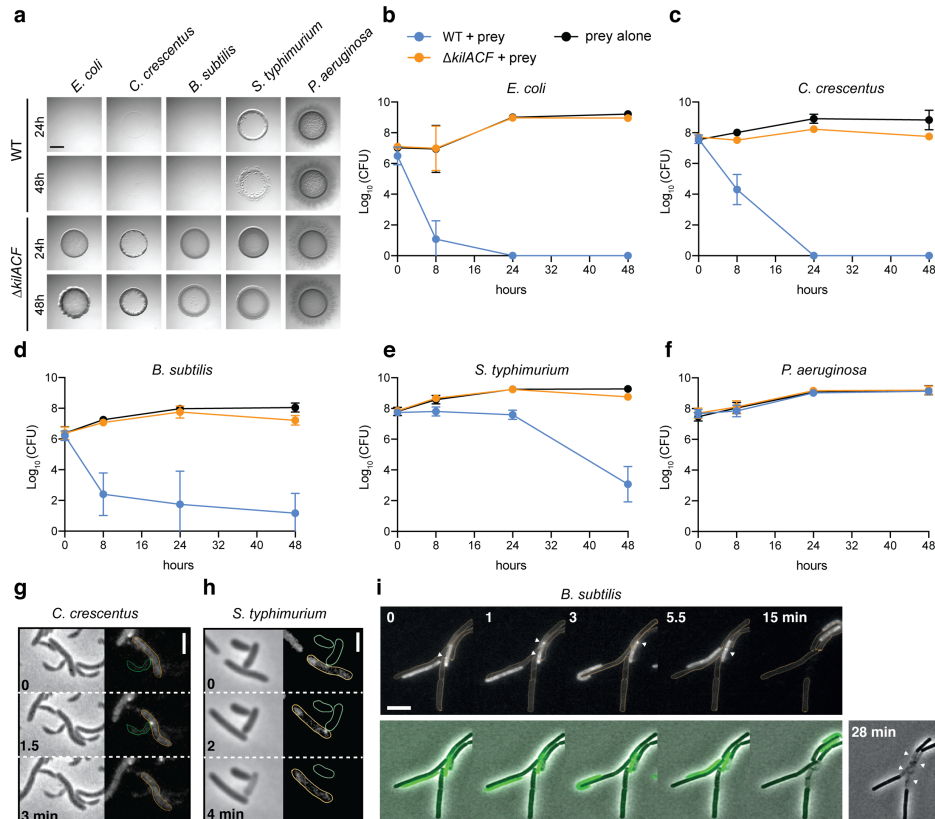

**Figure 6: The Kil system mediates killing against diverse bacterial species.**

**a:** The *kil* genes are predation determinants against various species. To evaluate if *M. xanthus kil* mutant had lost the ability to lyse by direct contact different preys, prey-cell suspensions were directly mixed with *M. xanthus* WT or  $\Delta kilACF$  and spotted on CF agar (+ 0.07% glucose). After 24 and 48 hours of incubation, pictures of the spots corresponding to the different predator/prey couples were taken. Note that *Pseudomonas aeruginosa* is resistant in this assay.

**b, c, d, e, f:** Prey cell survival upon predation was evaluated by CFU counting. The different preys were mixed with *M. xanthus* WT (blue circles) or  $\Delta kilACF$  (orange circles) strains and spotted on CF agar (+ 0.07% glucose). Spots were harvested after 0, 8, 24 and 48 hours of predation, serially diluted and plated on agar plates with kanamycin for CFU counting. The prey alone (black circles) was used as a control. Two experimental replicates were used per time point. This experiment was independently performed three times. Error bars represent the standard deviation to the mean.

**g:** NG-KilD cluster formation and subsequent contact-dependent killing of *Caulobacter crescentus*. Scale bar = 2  $\mu$ m. See corresponding Movie S11 for the full time lapse.

**h:** NG-KilD cluster formation and subsequent contact-dependent killing of *Salmonella enterica* Typhimurium. Scale bar = 2  $\mu$ m. See corresponding Movie S12 for the full time lapse.

**i:** NG-KilD cluster formation in contact with *B. subtilis*. See corresponding Movie S13 for the full time lapse. Scale bar = 2  $\mu$ m.

922  
923

924

925

926

927

928

929

930

931

932

933

934

935

936

937

938

939

940

941

942

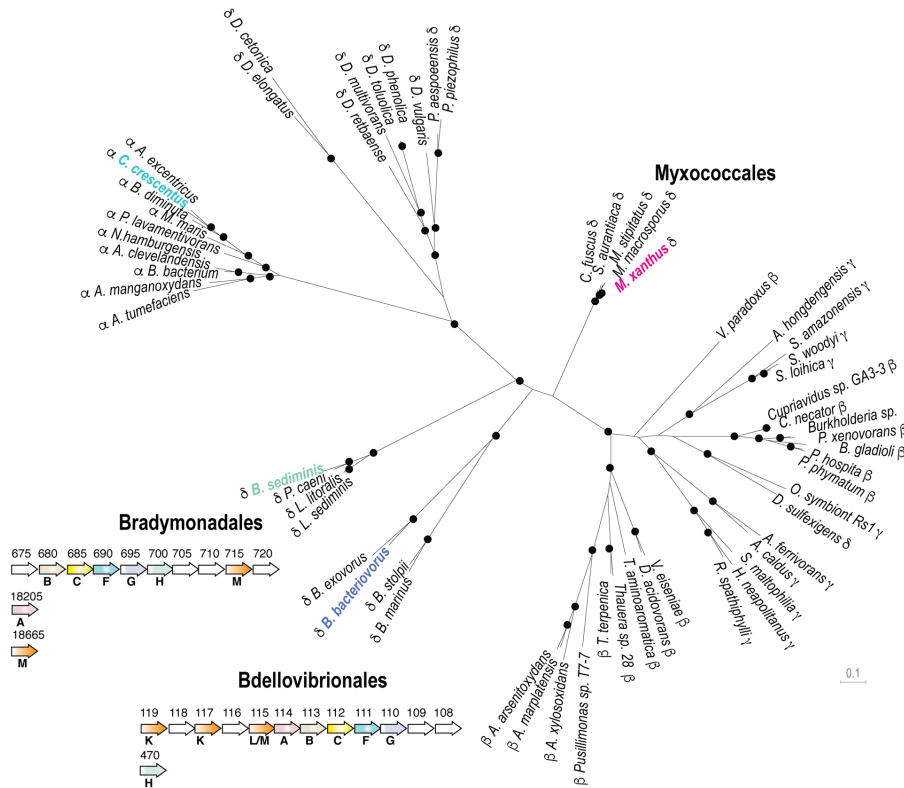

943  
944

945 **Figure 7. The Kil system is conserved in predatory delta-proteobacteria**

946 Phylogenetic tree of the Type-IV filamentous system that gave rise to the *M. xanthus* Kil system.  
947 Only the 4 well-conserved Kil system components were used for constructing the phylogenetic  
948 tree. Dots indicate stable bootstrap values (> 75), classes are indicated next to species names. The  
949 *M. xanthus* Kil system is also found in other *Myxococcales* and closely related systems are also  
950 present in *Bradymonadales* and *Bdellovibrionales*, suggesting a functional specialization related  
951 to predation. The genetic organization of *kil*-like genes is shown for example members of each  
952 orders, *Bradymonas sediminis* and *Bdellovibrio bacteriovorus* (see also Table S2). The  
953 nomenclature and color code for Kil homologs are the same as in Figure 3. Gene accession  
954 numbers (KEGG) are shown above gene symbols.

955  
956  
957

958  
959  
960  
961  
962

## Extended Figures and Legends

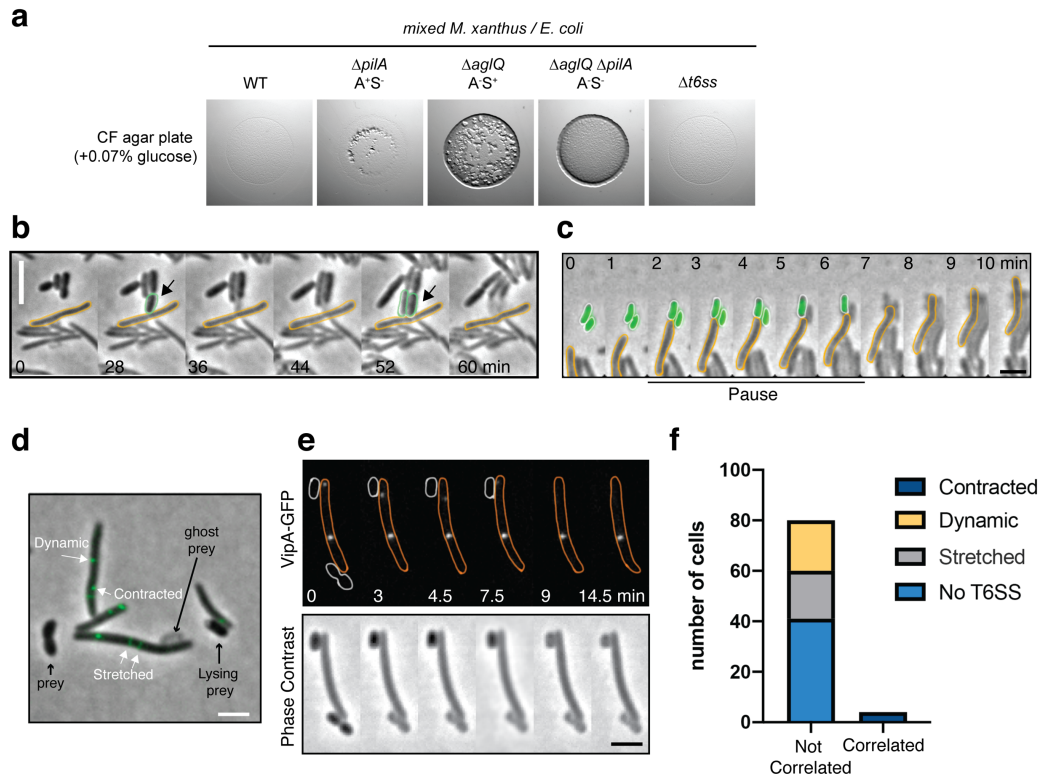

963  
964  
965  
966  
967  
968  
969  
970  
971  
972  
973  
974  
975  
976  
977  
978  
979  
980  
981  
982

### Figure S1. The motility complexes and the Type-6 Secretion System do not mediate contact-dependent killing.

**a:** WT *M. xanthus* and the different motility mutant strains were mixed with *E. coli* and spotted on CF 1.5% agar plates (+0.07% glucose). After 24 hours of incubations pictures were taken, showing that WT and  $\Delta t6ss$  had similar predation efficiencies. A A<sup>+</sup>S<sup>-</sup> ( $\Delta pilA$ ) strain presented a predation efficiency slightly reduced. However, the A<sup>+</sup>S<sup>+</sup> strain ( $\Delta aglQ$ ) was greatly impaired at predating. No predation was observed for the A<sup>+</sup>S<sup>-</sup> strain ( $\Delta aglQ \Delta pilA$ ). Therefore, A-motility appears to be essential for predation.

**b:** Contact-dependent killing by an A<sup>+</sup>S<sup>-</sup> motility mutant ( $\Delta aglQ \Delta pilA$ ). Growth of *E. coli* cells leads to contact with non-motile *Myxococcus* cells and rapid lysis. Example cell reflects events observed for n=20 events. Scale bar = 2  $\mu$ m.

**c:** Contact-dependent killing by a  $\Delta t6ss$  motility mutant. *E. coli* prey cells are labeled with GFP to monitor contact-dependent lysis. Example cell reflects events observed for n=20 events. Scale bar = 2  $\mu$ m.

**d-e:** T6SS VipA sheath assembly in *Myxococcus* cells during predation. Several assembly patterns are observed as described in other bacteria. Stretched: extended T6SS sheaths. Contracted: retracted T6SS sheath. Scale bars = 2  $\mu$ m.

**f:** Prey contact-dependent lysis is not correlated to T6SS sheath contraction. Contact-dependent lysis and VipA-GFP dynamics were observed simultaneously. Contraction and lysis at the

983 contacted site were only marginally observed (correlated) suggesting that T6SS intoxication plays  
984 a minor role at best in contact-dependent killing.  
985

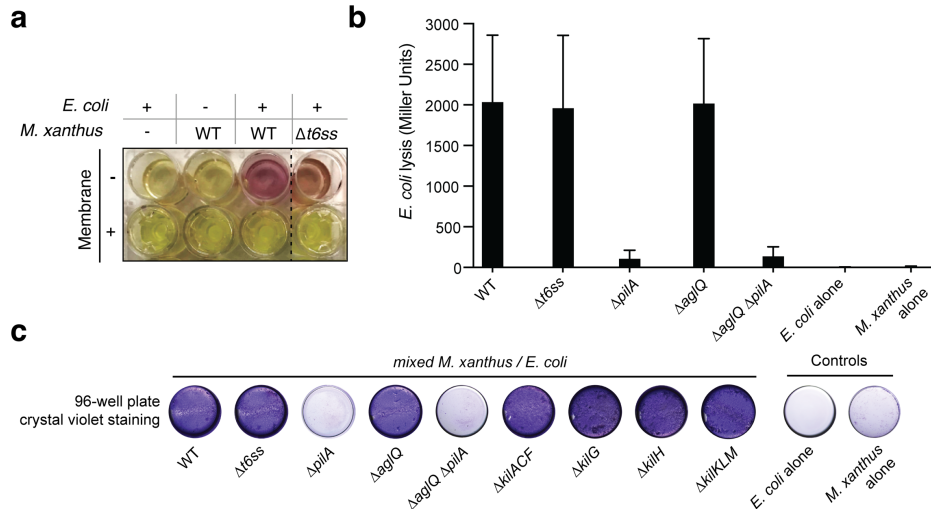

986  
987

**Figure S2. Contact-dependent lysis in liquid cultures.**

988 **a:** *E. coli* lysis is detected as extracellular release of LacZ allows hydrolysis of CPRG which  
989 becomes colored after 24 hours. Lysis is not observed when *Myxococcus* (WT or  $\Delta t6ss$ ) and *E.*  
990 *coli* are separated by a membrane, showing that it is contact-dependent.  
991

992 **b:** A CPRG assay was performed with these same strains as in Figure S1a.  $\beta$ -galactosidase  
993 activities of the cell lysates (n=4, expressed in Miller Units) were measured for each strain. After  
994 24-hour incubation, only WT and  $\Delta t6ss$  strains had the ability to lyse *E. coli* in liquid. PilA appears  
995 to be essential for cell-cell contact with *E. coli* and cell lysis in liquid. This experiment was  
996 independently performed four times. Error bars represent the standard deviation to the mean.

997 **c:** Crystal violet assay. After 24-hour incubation, wells containing the different *M. xanthus*  
998 strains mixed with *E. coli* were stained with a crystal violet solution to revealed biofilm formation. The  
999  $\Delta pilA$  strains appeared to be deficient at forming a biofilm in the presence of a prey.

1000  
1001

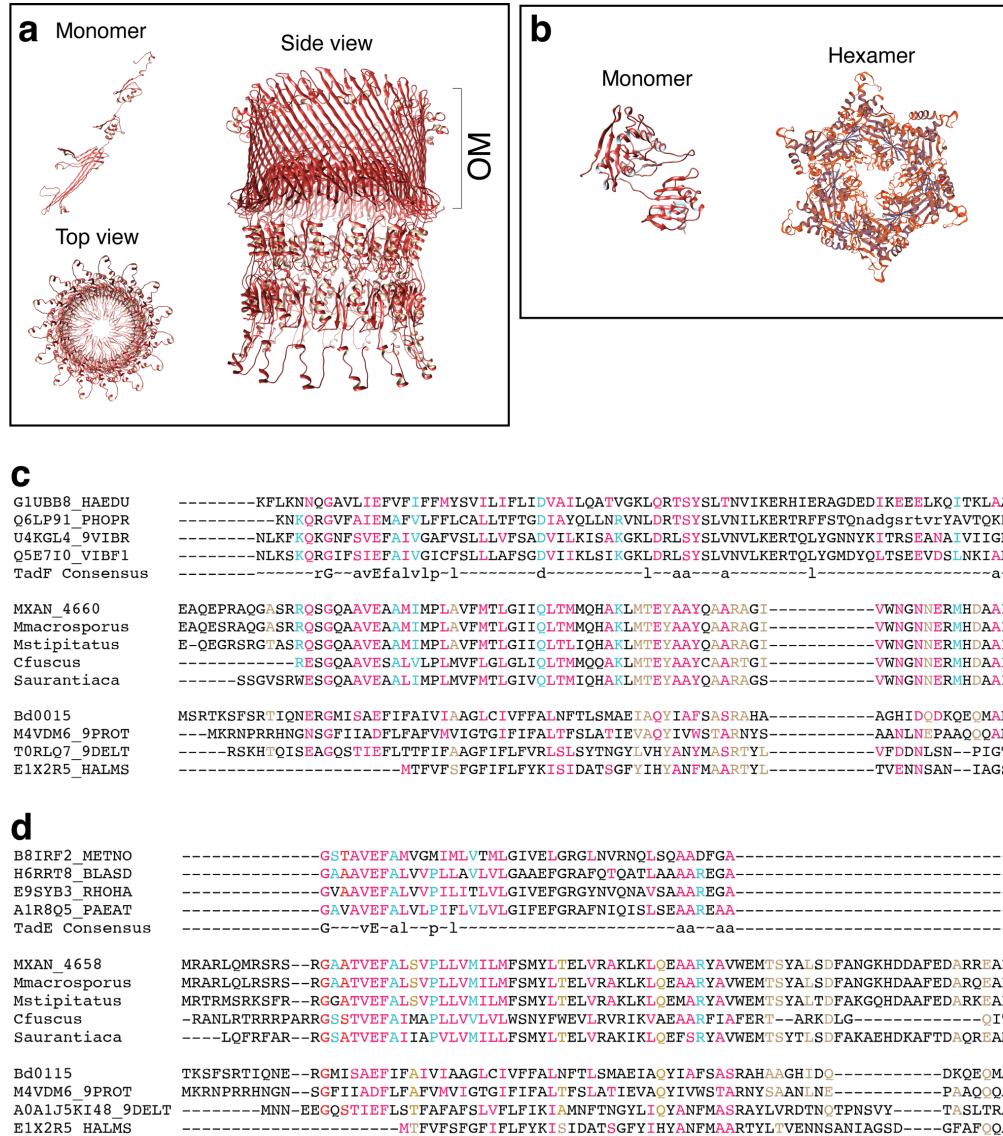

### Figure S3: Bioinformatics analyses of Kil proteins.

**a, b:** Structural models of the putative KilC secretin (a) and KilF hexameric ATPase (b). KilC Secretin: tertiary and quaternary structural models were based on the structure of *E. coli* type II secretion system GspD protein D (PDB identifier 5WQ7) and generated with SWISS-MODEL (Methods). ATPase: modeled with Phyre2 and SWISS-MODEL based on the structure of the *Sulfolobus acidocaldarius* FlaI ATPase (PDB identifier 4II7).

**c,d:** Analysis of putative pseudo-pilin proteins. For clarity, the multiple alignment is separated in three blocks representing the three different groups, the alpha-proteobacteria, the *Myxococcales* and the *Bdellovibrionales*. All sequences except the one from *C. fuscus* were taken from HHPRED matrix alignments. Residues conserved between the pfam domains TadF and the MXAN\_4660 family, as well as TadE and the MXAN\_4658 family, respectively, are highlighted in cyan; those conserved between the Bd0115 family and the MXAN\_4660 family, as well as TadE and the MXAN\_4658 family, respectively are highlighted in brown; residues conserved in all (TadF, MXAN\_4660, Bd0115, TadE, MXAN\_4658, Bd0115, respectively) are highlighted in red.

1002  
1003

1004

1005

1006

1007

1008

1009

1010

1011

1012

1013

1014

1015

1016

1017



1018 **c:** HHPRED-based multiple sequence alignment of MXAN\_4660 (KilM) with the TadF domain  
1019 and pilus assembly protein Bd0115 from *B. bacteriovorus*. Myxobacterial sequences correspond  
1020 to the following NCBI RefSeq IDs: *Myxococcus xanthus*: WP\_011554652; *Myxococcus stipitatus*:  
1021 WP\_015350653; *Myxococcus macrosporus*: WP\_043711698; *Stigmatella aurantiaca*:  
1022 WP\_013376800; *Cystobacter fuscus*: WP\_002624349.

1023 **d:** HHPRED-based multiple sequence alignment of MXAN\_4658 with the TadE domain and pilus  
1024 assembly protein Bd0115 from *B. bacteriovorus*. Myxobacterial sequences correspond to the  
1025 following NCBI RefSeq IDs: *M. xanthus*: WP\_011554650; *M. stipitatus*: WP\_015350651; *M.*  
1026 *macrosporus*: WP\_043711696; *S. aurantiaca*: WP\_013376798; *C. fuscus*: WP\_002624796.  
1027

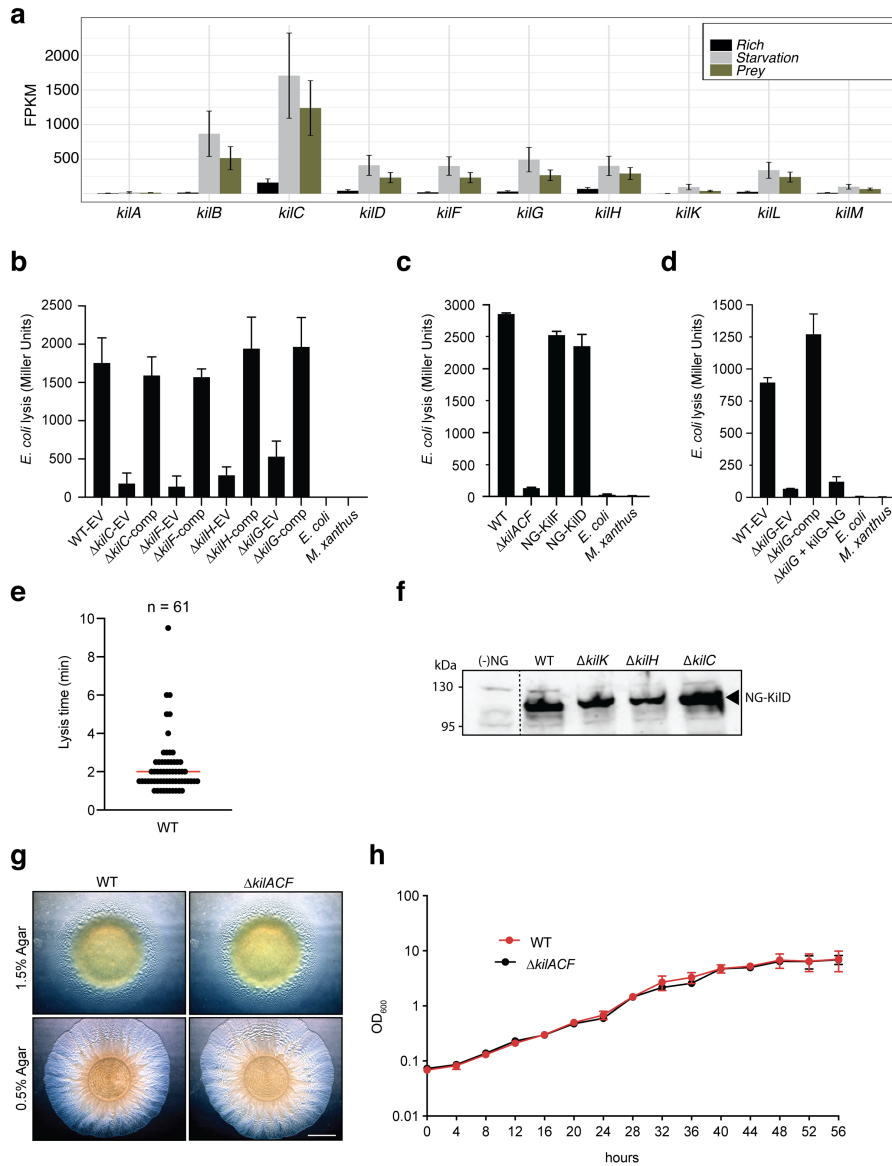

1028  
1029

1030

**Figure S4: Functional analysis of the *kil* genes.**

1031 **a:** The *kil* genes are expressed during starvation. RNA-seq analysis of *kil* gene expression in rich  
1032 medium, starvation medium and starvation medium with live prey cells extracted and computed  
1033 from data by Livingstone *et al.*<sup>61</sup>. For each gene and condition the data is compiled from three  
1034 independent biological replicates. Note addition of prey does not change the expression profile  
1035 which is significantly induced by starvation alone.

1036 **b:** CPRG colorimetric assay. In a 96-well plate, the different *kil* strains transformed with pSWU19-  
1037 EV (Empty Vector) or complemented (comp) with a pSWU19 carrying the different *kil* genes were  
1038 incubated with *E. coli* in liquid. After 24-hour incubation,  $\beta$ -galactosidase activities (expressed as  
1039 Miller Units) of the different cell lysates were measured. The *kil* mutants ectopically expressing  
1040 the different *kil* genes under the control of the *pilA* promoter presented a restored predation  
1041 phenotype similar to WT-EV control. *E. coli* and *M. xanthus* alone were used as negative controls.  
1042 This experiment was independently performed twice with at least two experimental replicates per  
1043 strain each time. Error bars represent the standard deviation to the mean.

1044 **c:** the strains expressing neon Green (NG) fusions of KilD or KilF have predation phenotype  
1045 similar to wild-type in a CPRG colorimetric assay. This experiment was independently performed  
1046 twice. Error bars represent the standard deviation to the mean.

1047 **d:**  $\Delta kilG$  strain expressing KilG-NG is defective in predation. CPRG colorimetric assay. In a 96-  
1048 well plate,  $\Delta kilG$  transformed with pSWU19-EV, pSWU19-*PpilA-kilG* or pSWU19-*PpilA-kilG-*  
1049 *NG* gene was incubated with *E. coli* in liquid. After 24-hour incubation,  $\beta$ -galactosidase activities  
1050 (expressed as Miller Units) of the different cell lysates were measured. Only  $\Delta kilG$  pSWU19-  
1051 *PpilA-kilG* complemented strain presented restored predation phenotype similar to the WT-EV  
1052 control. *E. coli* and *M. xanthus* alone were used as negative controls. This experiment was  
1053 performed once with four experimental replicates per strain. Error bars represent the standard  
1054 deviation to the mean.

1055 **e:** Time to lysis after cluster formation. Time to lysis was determined by first monitoring cluster  
1056 formation and then loss of contrast by the prey cell. The measurements were performed over two  
1057 biological replicates. The median is shown as a red bar.

1058 **f:** Stable expression of NG-KilD in different mutant backgrounds. NG-KilD is detected at the  
1059 expected molecular weight by the anti-neon Green antibody. (-) NG: DZ2 *Myxococcus* cell extracts  
1060 that do not express neon Green. Dotted line indicates gel splicing.

1061 **g:** Growth and motility of WT and  $\Delta kilACF$  mutant strains on agar supporting both A- and S-  
1062 motility (1.5%) and S-motility only (0.5%). Scale bar = 2 mm.

1063 **h:** Growth curves of WT and  $\Delta kilACF$  mutant in CYE rich medium. The measurements were  
1064 performed over three biological replicates. Error bars represent the standard deviation to the mean.  
1065

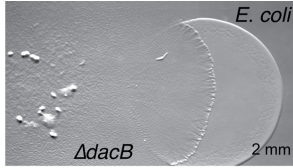

1066  
1067

1068 **Figure S5:** Predation phenotype of a *Myxococcus* D,D-decarboxylase mutant<sup>42</sup>. Colony plate  
1069 assays showing invasion of an *E. coli* prey colony (dotted line) 48 hours after plating by a *dacB*  
1070 mutant. Scale bar = 2 mm.

1071  
1072  
1073

#### 1074 **Legends to Supplemental Movies**

1075

1076 **Movie S1: Invasion of *E. coli* colonies by WT *Myxococcus* cells.** This movie was taken at the  
1077 interface between the two colonies during invasion. The movie is a 8x compression of an original  
1078 movie that was shot for 10 hours with a frame taken every 30s at 40x magnification. To facilitate  
1079 *Myxococcus* cells tracking, the wild-type strain was labeled with the mCherry fluorescent protein.

1080

1081 **Movie S2: A-motility is required for prey invasion.** This movie was taken at the interface  
1082 between the two colonies during invasion. The movie is a compression of an original movie that  
1083 was shot for 10 hours with a frame taken every 30s at 40x magnification. To facilitate *Myxococcus*  
1084 cells tracking, the A<sup>S+</sup> (*ΔaglQ*) strain was labeled with the mCherry fluorescent protein.

1085

1086 **Movie S3: Prey invasion by A-motile cells in “arrowhead” formations.** Focal adhesions and  
1087 thus active A-motility complexes were detected with an AglZ-Neon green fusion. The movie  
1088 contains 51 frames taken every 30 seconds at 100x magnification. Shown side-by-side are  
1089 fluorescence images, fluorescence overlaid with phase contrast and MiSiC segmentation (lysing  
1090 *E. coli* cells are colored magenta and blue).

1091

1092 **Movie S4: A *Myxococcus* cell kills an *E. coli* cell by contact.** The *Myxococcus* cell expresses  
1093 AglZ-nG and the *E. coli* cell expresses mCherry. Shown side-by-side are fluorescence images and  
1094 MiSiC segmentation (*Myxococcus*: green, *E. coli*: magenta). The movie contains 20 frames taken  
1095 every 30 seconds at 100x magnification.

1096

1097 **Movie S5: NG-KilF cluster formation in contact with *E. coli* prey cells.** Shown is an overlay  
1098 of the fluorescence and phase contrast images of a motile *Myxococcus* cell in predatory contact  
1099 with three *E. coli* cells. The movie was shot at 100x magnification objective for 30 minutes.  
1100 Pictures were taken every 30 seconds.

1101

1102 **Movie S6: KilG-NG cluster formation in contact with *E. coli* prey cells.** Shown is an overlay  
1103 of the fluorescence and phase contrast images of a motile *Myxococcus* cell in predatory contact  
1104 with three *E. coli* cells. The movie was shot at 100x magnification objective for 9 minutes. Pictures  
1105 were taken every 30 seconds.

1106

1107 **Movie S7: NG-KilD cluster formation in contact with *E. coli* prey cells.** Shown is an overlay  
1108 of the fluorescence and phase contrast images of a motile *Myxococcus* cell in predatory contact

1109 with three *E. coli* cells. The movie was shot at 100x magnification objective for 15 minutes.  
1110 Pictures were taken every 30 seconds.

1111  
1112 **Movie S8: NG-KilD clusters form in a *kilC* mutant but no motility pauses and prey cell lysis**  
1113 **can be observed.** Shown is an overlay of the fluorescence and phase contrast images of a motile  
1114 *Myxococcus* cell in predatory contact with three *E. coli* cells. The movie was shot at 100x  
1115 magnification objective for 8 minutes. Pictures were taken every 30 seconds.

1116  
1117 **Movie S9: a  $\Delta$ *kilACF* still invades but does not kill *E. coli* prey cells.** This movie was taken at  
1118 the interface between the two colonies during invasion. The movie is a 4x compression of an  
1119 original movie that was shot for 4.5 hours with a frame taken every 30s at 40x magnification. To  
1120 facilitate *Myxococcus*  $\Delta$ *kilACF* cells are labeled with the mCherry fluorescent protein.

1121  
1122 **Movie S10: Predatory cells division and tracking during invasion of prey colony.** To follow  
1123 cell growth and division at the single cell level during prey invasion, WT cells were mixed with a  
1124 WT strain expressing the mCherry at a 50:1 ratio and imaged every 30 seconds at 40x  
1125 magnification for up to 10 hours within non-labeled prey colonies. Cell growth was measured by  
1126 fitting cell contours to medial axis model followed by tracking under Microbe-J. Real time of the  
1127 track for the example cell: 95 min.

1128  
1129 **Movie S11: NG-KilD cluster formation in contact with *Caulobacter crescentus* prey cells.**  
1130 Shown is an overlay of the fluorescence and phase contrast images of a motile *Myxococcus* cell in  
1131 predatory contact with a *C. crescentus* cell. The movie was shot at 100x magnification objective  
1132 for 7 minutes. Pictures were taken every 30 seconds.

1133  
1134 **Movie S12: NG-KilD cluster formation in contact with *Salmonella typhimurium* prey cells.**  
1135 Shown is an overlay of the fluorescence and phase contrast images of a motile *Myxococcus* cell in  
1136 predatory contact with an *S. enterica* Typhimurium cell. The movie was shot at 100x magnification  
1137 objective for 20 minutes. Pictures were taken every 30 seconds.

1138  
1139 **Movie S13: NG-KilD cluster formation in contact with *Bacillus subtilis* prey cells.** Shown is  
1140 an overlay of the fluorescence and phase contrast images of a motile *Myxococcus* cell in predatory  
1141 contact with a *B. subtilis* cell. The movie was shot at 100x magnification objective for 30 minutes.  
1142 Pictures were taken every 30 seconds.

1143  
1144 **Movie S14: *Pseudomonas aeruginosa* is not lysed by *Myxococcus* and does not induce NG-**  
1145 **KilD cluster formation.** Shown is an overlay of the fluorescence and phase contrast images of a  
1146 motile *Myxococcus* cells mixed with *Pseudomonas* cells. The movie was shot at 100x  
1147 magnification objective for 30 minutes. Pictures were taken every 30 seconds.

1148  
1149  
1150
